# Supplementary material
Source: HighWire-hosted journal article supplement (https://bmjopen.bmj.com/content/13/5/e066813)
Supplement: inline-supplementary-material-1 [file inline-supplementary-material-1.pdf]

## APPENDIX

**Table 1. List of General Surgical Procedures on Which Black and White Patients Were Exact Matched**

| <b>Procedure Code</b> | <b>Procedure Name</b>                                                                                   |
|-----------------------|---------------------------------------------------------------------------------------------------------|
| PPX 062               | Unilateral thyroid lobectomy                                                                            |
| PPX 0631              | Excision of lesion of thyroid                                                                           |
| PPX 0639              | Other partial thyroidectomy                                                                             |
| PPX 064               | Complete thyroidectomy                                                                                  |
| PPX 0650              | Substernal thyroidectomy, not otherwise specified                                                       |
| PPX 0651              | Partial substernal thyroidectomy                                                                        |
| PPX 0652              | Complete substernal thyroidectomy                                                                       |
| PPX 0681              | Complete parathyroidectomy                                                                              |
| PPX 0689              | Other parathyroidectomy                                                                                 |
| PPX 0722              | Unilateral adrenalectomy                                                                                |
| PPX 1711              | Laparoscopic repair of direct inguinal hernia with graft or prosthesis                                  |
| PPX 1712              | Laparoscopic repair of indirect inguinal hernia with graft or prosthesis                                |
| PPX 1713              | Laparoscopic repair of inguinal hernia with graft or prosthesis, not otherwise specified                |
| PPX 1721              | Laparoscopic bilateral repair of direct inguinal hernia with graft or prosthesis                        |
| PPX 1722              | Laparoscopic bilateral repair of indirect inguinal hernia with graft or prosthesis                      |
| PPX 1723              | Laparoscopic bilateral repair of inguinal hernia, one direct and one indirect, with graft or prosthesis |
| PPX 1724              | Laparoscopic bilateral repair of inguinal hernia with graft or prosthesis, not otherwise specified      |
| PPX 1731              | Laparoscopic multiple segmental resection of large intestine                                            |
| PPX 1732              | Laparoscopic cecectomy                                                                                  |
| PPX 1733              | Laparoscopic right hemicolectomy                                                                        |
| PPX 1734              | Laparoscopic resection of transverse colon                                                              |
| PPX 1735              | Laparoscopic left hemicolectomy                                                                         |
| PPX 1736              | Laparoscopic sigmoidectomy                                                                              |
| PPX 1739              | Other laparoscopic partial excision of large intestine                                                  |
| PPX 415               | Total splenectomy                                                                                       |
| PPX 4240              | Esophagectomy, not otherwise specified                                                                  |
| PPX 4241              | Partial esophagectomy                                                                                   |
| PPX 4242              | Total esophagectomy                                                                                     |
| PPX 427               | Esophagomyotomy                                                                                         |
| PPX 4342              | Local excision of other lesion or tissue of stomach                                                     |
| PPX 435               | Partial gastrectomy with anastomosis to esophagus                                                       |
| PPX 436               | Partial gastrectomy with anastomosis to duodenum                                                        |
| PPX 437               | Partial gastrectomy with anastomosis to jejunum                                                         |
| PPX 4389              | Open and other partial gastrectomy                                                                      |
| PPX 4399              | Other total gastrectomy                                                                                 |
| PPX 4429              | Other pyloroplasty                                                                                      |
| PPX 4438              | Laparoscopic gastroenterostomy                                                                          |
| PPX 4439              | Other gastroenterostomy without gastrectomy                                                             |
| PPX 4441              | Suture of gastric ulcer site                                                                            |
| PPX 4442              | Suture of duodenal ulcer site                                                                           |
| PPX 4466              | Other procedures for creation of esophagogastric sphincteric competence                                 |

|          |                                                                                |
|----------|--------------------------------------------------------------------------------|
| PPX 4467 | Laparoscopic procedures for creation of esophagogastric sphincteric competence |
| PPX 4469 | Other repair of stomach                                                        |
| PPX 4561 | Multiple segmental resection of small intestine                                |
| PPX 4562 | Other partial resection of small intestine                                     |
| PPX 4563 | Total removal of small intestine                                               |
| PPX 4571 | Open and other multiple segmental resection of large intestine                 |
| PPX 4572 | Open and other cecectomy                                                       |
| PPX 4573 | Open and other right hemicolectomy                                             |
| PPX 4574 | Open and other resection of transverse colon                                   |
| PPX 4575 | Open and other left hemicolectomy                                              |
| PPX 4576 | Open and other sigmoidectomy                                                   |
| PPX 4579 | Other and unspecified partial excision of large intestine                      |
| PPX 458  | Other and unspecified partial excision of large intestine                      |
| PPX 4581 | Laparoscopic total intra-abdominal colectomy                                   |
| PPX 4582 | Open total intra-abdominal colectomy                                           |
| PPX 4583 | Other and unspecified total intra-abdominal colectomy                          |
| PPX 4590 | Intestinal anastomosis, not otherwise specified                                |
| PPX 4591 | Small-to-small intestinal anastomosis                                          |
| PPX 4592 | Anastomosis of small intestine to rectal stump                                 |
| PPX 4593 | Other small-to-large intestinal anastomosis                                    |
| PPX 4594 | Large-to-large intestinal anastomosis                                          |
| PPX 4595 | Anastomosis to anus                                                            |
| PPX 4601 | Exteriorization of small intestine                                             |
| PPX 4603 | Exteriorization of large intestine                                             |
| PPX 4610 | Colostomy, not otherwise specified                                             |
| PPX 4611 | Temporary colostomy                                                            |
| PPX 4613 | Permanent colostomy                                                            |
| PPX 4620 | Ileostomy, not otherwise specified                                             |
| PPX 4621 | Temporary ileostomy                                                            |
| PPX 4622 | Continent ileostomy                                                            |
| PPX 4623 | Other permanent ileostomy                                                      |
| PPX 4639 | Other enterostomy                                                              |
| PPX 4642 | Repair of pericostomy hernia                                                   |
| PPX 4651 | Closure of stoma of small intestine                                            |
| PPX 4652 | Closure of stoma of large intestine                                            |
| PPX 4673 | Suture of laceration of small intestine, except duodenum                       |
| PPX 4674 | Closure of fistula of small intestine, except duodenum                         |
| PPX 4675 | Suture of laceration of large intestine                                        |
| PPX 4679 | Other repair of intestine                                                      |
| PPX 4701 | Laparoscopic appendectomy                                                      |
| PPX 4709 | Other appendectomy                                                             |
| PPX 4849 | Other pull-through resection of rectum                                         |
| PPX 485  | Other pull-through resection of rectum                                         |
| PPX 4850 | Abdominoperineal resection of the rectum, not otherwise specified              |
| PPX 4851 | Laparoscopic abdominoperineal resection of the rectum                          |
| PPX 4852 | Open abdominoperineal resection of the rectum                                  |
| PPX 4862 | Anterior resection of rectum with synchronous colostomy                        |
| PPX 4863 | Other anterior resection of rectum                                             |
| PPX 4869 | Other resection of rectum                                                      |

|          |                                                                                                           |
|----------|-----------------------------------------------------------------------------------------------------------|
| PPX 4875 | Abdominal proctopexy                                                                                      |
| PPX 4876 | Other proctopexy                                                                                          |
| PPX 5022 | Partial hepatectomy                                                                                       |
| PPX 5029 | Other destruction of lesion of liver                                                                      |
| PPX 503  | Lobectomy of liver                                                                                        |
| PPX 5122 | Cholecystectomy                                                                                           |
| PPX 5123 | Laparoscopic cholecystectomy                                                                              |
| PPX 5124 | Laparoscopic partial cholecystectomy                                                                      |
| PPX 5132 | Anastomosis of gallbladder to intestine                                                                   |
| PPX 5136 | Choledochoenterostomy                                                                                     |
| PPX 5137 | Anastomosis of hepatic duct to gastrointestinal tract                                                     |
| PPX 5141 | Common duct exploration for removal of calculus                                                           |
| PPX 5151 | Exploration of common duct                                                                                |
| PPX 5252 | Distal pancreatectomy                                                                                     |
| PPX 5259 | Other partial pancreatectomy                                                                              |
| PPX 526  | Total pancreatectomy                                                                                      |
| PPX 527  | Radical pancreaticoduodenectomy                                                                           |
| PPX 5300 | Unilateral repair of inguinal hernia, not otherwise specified                                             |
| PPX 5301 | Other and open repair of direct inguinal hernia                                                           |
| PPX 5302 | Other and open repair of indirect inguinal hernia                                                         |
| PPX 5303 | Other and open repair of direct inguinal hernia with graft or prosthesis                                  |
| PPX 5304 | Other and open repair of indirect inguinal hernia with graft or prosthesis                                |
| PPX 5305 | Repair of inguinal hernia with graft or prosthesis, not otherwise specified                               |
| PPX 5310 | Bilateral repair of inguinal hernia, not otherwise specified                                              |
| PPX 5311 | Other and open bilateral repair of direct inguinal hernia                                                 |
| PPX 5313 | Other and open bilateral repair of inguinal hernia, one direct and one indirect                           |
| PPX 5314 | Other and open bilateral repair of direct inguinal hernia with graft or prosthesis                        |
| PPX 5315 | Other and open bilateral repair of indirect inguinal hernia with graft or prosthesis                      |
| PPX 5316 | Other and open bilateral repair of inguinal hernia, one direct and one indirect, with graft or prosthesis |
| PPX 5317 | Bilateral inguinal hernia repair with graft or prosthesis, not otherwise specified                        |
| PPX 5321 | Unilateral repair of femoral hernia with graft or prosthesis                                              |
| PPX 5329 | Other unilateral femoral herniorrhaphy                                                                    |
| PPX 5341 | Other and open repair of umbilical hernia with graft or prosthesis                                        |
| PPX 5349 | Other open umbilical herniorrhaphy                                                                        |
| PPX 5351 | Incisional hernia repair                                                                                  |
| PPX 5359 | Repair of other hernia of anterior abdominal wall                                                         |
| PPX 5361 | Other open incisional hernia repair with graft or prosthesis                                              |
| PPX 5369 | Other and open repair of other hernia of anterior abdominal wall with graft or prosthesis                 |
| PPX 537  | Other and open repair of other hernia of anterior abdominal wall with graft or prosthesis                 |
| PPX 5372 | Other and open repair of diaphragmatic hernia, abdominal approach                                         |
| PPX 5451 | Laparoscopic lysis of peritoneal adhesions                                                                |
| PPX 5459 | Other lysis of peritoneal adhesions                                                                       |
| PPX 5493 | Creation of cutaneous peritoneal fistula                                                                  |
| PPX 7072 | Repair of colovaginal fistula                                                                             |
| PPX 7073 | Repair of rectovaginal fistula                                                                            |
| PPX 7074 | Repair of other vaginoenteric fistula                                                                     |

**Appendix 2. Risk Model for Defining Probability of 30-day Death**

To balance case and control patients on their risk profile, logistic regression models were used to predict each patient's 30-day risk of death. For general surgery patients a model was fit to an external dataset of Medicare claims. The external dataset was created by taking a 10% random sample of Medicare patients in California, Florida, New Jersey, and Pennsylvania for the years 2013-2015 (for the Recent Era) and 2004-2006 (for the Early Era). Patients in this external dataset were not used for matching. Coefficients for each of the variables were then applied to patients in the matching dataset to assign each patient's risk of 30-day death. The resulting risk scores were then used as a matching variable.

**Table 2a. General Surgery Probability of Death Model, Early Era (2004 – 2006)**

| Variable                             | Estimate | Standard Error | Z       | P-value |
|--------------------------------------|----------|----------------|---------|---------|
| Model Intercept                      | -10.6767 | 1.1413         | -9.3552 | <0.0001 |
| California                           | 0.0109   | 0.1179         | 0.0925  | 0.9263  |
| New Jersey                           | 0.1057   | 0.1249         | 0.8459  | 0.3976  |
| Florida                              | 0.0242   | 0.1077         | 0.2249  | 0.8221  |
| Pennsylvania (reference)             | --       | --             | --      | --      |
| Matched in year 2004                 | 0.0068   | 0.1119         | 0.0604  | 0.9518  |
| Matched in year 2005                 | 0.0865   | 0.0917         | 0.9439  | 0.3452  |
| Matched in year 2006 (reference)     | --       | --             | --      | --      |
| Sex (male)                           | 0.1616   | 0.0860         | 1.8797  | 0.0601  |
| Age                                  | 0.0641   | 0.0059         | 10.7924 | <0.0001 |
| CHF                                  | 0.4098   | 0.0921         | 4.4479  | <0.0001 |
| Stroke                               | 0.2380   | 0.1220         | 1.9517  | 0.0510  |
| Seizure                              | 0.0450   | 0.3142         | 0.1434  | 0.8860  |
| Dementia                             | 0.3773   | 0.1029         | 3.6677  | 0.0002  |
| History of Alcoholism                | 0.4503   | 0.2395         | 1.8802  | 0.0601  |
| History of Drug Abuse                | 0.1532   | 0.5311         | 0.2884  | 0.7731  |
| Past Myocardial Infarction           | 0.0569   | 0.1263         | 0.4505  | 0.6524  |
| Past Arrhythmia                      | 0.0391   | 0.0900         | 0.4345  | 0.6639  |
| Unstable Angina                      | -0.0142  | 0.1883         | -0.0752 | 0.9401  |
| Angina                               | -0.0150  | 0.1417         | -0.1055 | 0.9160  |
| Hypertension                         | -0.5268  | 0.1019         | -5.1726 | <0.0001 |
| Valvular Disease                     | 0.1125   | 0.0868         | 1.2966  | 0.1948  |
| Chronic Lung Disease                 | 0.3044   | 0.0848         | 3.5886  | 0.0003  |
| Asthma                               | -0.2342  | 0.1468         | -1.5947 | 0.1108  |
| Liver Disease                        | 0.2035   | 0.1129         | 1.8030  | 0.0714  |
| Renal Dysfunction                    | 1.2255   | 0.0971         | 12.6197 | <0.0001 |
| Renal Failure                        | 0.2284   | 0.1242         | 1.8400  | 0.0658  |
| Diabetes                             | 0.0158   | 0.0895         | 0.1759  | 0.8603  |
| Paraplegia                           | 0.2181   | 0.2282         | 0.9561  | 0.3390  |
| Collagen Vascular Disease            | 0.2112   | 0.1649         | 1.2806  | 0.2003  |
| Coagulopathy                         | -0.1163  | 0.5253         | -0.2215 | 0.8247  |
| Thrombocytopenia                     | -0.1908  | 0.2429         | -0.7856 | 0.4321  |
| Other Coagulopathy                   | 0.5029   | 0.1313         | 3.8284  | 0.0001  |
| Smoking History                      | -0.0286  | 0.1583         | -0.1807 | 0.8566  |
| Post-Inflammatory Pulmonary Fibrosis | 0.2132   | 0.1633         | 1.3058  | 0.1916  |
| Cushings' Disease                    | 0.0084   | 1.1029         | 0.0076  | 0.9939  |
| Graves' Disease                      | -1.1096  | 1.0342         | -1.0730 | 0.2833  |
| Cancer                               | 0.0279   | 0.0915         | 0.3048  | 0.7605  |
| Abdominal Cancer                     | 0.4383   | 0.1706         | 2.5692  | 0.0102  |
| Hypothyroidism                       | -0.0826  | 0.0994         | -0.8313 | 0.4058  |
| Chronic Peptic Ulcer                 | -0.2788  | 0.5092         | -0.5477 | 0.5839  |
| Weight loss                          | 0.4583   | 0.0920         | 4.9833  | <0.0001 |
| Major Secondary Procedure            | 0.0107   | 0.0903         | 0.1187  | 0.9055  |
| Emergency admission                  | 0.5653   | 0.0878         | 6.4353  | <0.0001 |
| Transfer-in status                   | -0.6881  | 0.4320         | -1.5929 | 0.1112  |

| Variable                                                                                | Estimate | Standard Error | Z       | P-value |
|-----------------------------------------------------------------------------------------|----------|----------------|---------|---------|
| Procedure group A                                                                       | -0.6929  | 1.4362         | -0.4825 | 0.6295  |
| PPX 062 Unilateral thyroid lobectomy                                                    |          |                |         |         |
| PPX 0631 Excision of lesion of thyroid                                                  |          |                |         |         |
| PPX 0639 Other partial thyroidectomy                                                    |          |                |         |         |
| PPX 0651 Partial substernal thyroidectomy                                               |          |                |         |         |
| PPX 0652 Complete substernal thyroidectomy                                              |          |                |         |         |
| PPX 0689 Other parathyroidectomy                                                        |          |                |         |         |
| Procedure group B                                                                       | 1.5421   | 1.1639         | 1.3250  | 0.1852  |
| PPX 5251 Proximal pancreatectomy                                                        |          |                |         |         |
| PPX 526 Total pancreatectomy                                                            |          |                |         |         |
| PPX 527 Radical pancreaticoduodenectomy                                                 |          |                |         |         |
| Procedure group C                                                                       | 1.1142   | 1.1878         | 0.9381  | 0.3482  |
| PPX 4651 Closure of stoma of small intestine                                            |          |                |         |         |
| PPX 4652 Closure of stoma of large intestine                                            |          |                |         |         |
| PPX 4674 Closure of fistula of small intestine, except duodenum                         |          |                |         |         |
| PPX 7072 Repair of colovaginal fistula                                                  |          |                |         |         |
| PPX 7073 Repair of rectovaginal fistula                                                 |          |                |         |         |
| PPX 7074 Repair of other vaginoenteric fistula                                          |          |                |         |         |
| Procedure group D                                                                       | 0.3963   | 1.4401         | 0.2752  | 0.7832  |
| PPX 064 Complete thyroidectomy                                                          |          |                |         |         |
| PPX 0681 Complete parathyroidectomy                                                     |          |                |         |         |
| Procedure group E                                                                       | 2.0174   | 1.4668         | 1.3754  | 0.1690  |
| PPX 0722 Unilateral adrenalectomy                                                       |          |                |         |         |
| PPX 0729 Other partial adrenalectomy                                                    |          |                |         |         |
| PPX 073 Bilateral adrenalectomy                                                         |          |                |         |         |
| Procedure group F                                                                       | 1.1859   | 1.4621         | 0.8111  | 0.4173  |
| PPX 4240 Esophagectomy, not otherwise specified                                         |          |                |         |         |
| PPX 4241 Partial esophagectomy                                                          |          |                |         |         |
| PPX 4242 Total esophagectomy                                                            |          |                |         |         |
| PPX 427 Esophagomyotomy                                                                 |          |                |         |         |
| Procedure group G                                                                       | 2.6137   | 1.0715         | 2.4393  | 0.0147  |
| PPX 435 Partial gastrectomy with anastomosis to esophagus                               |          |                |         |         |
| PPX 4389 Open and other partial gastrectomy                                             |          |                |         |         |
| PPX 4438 Laparoscopic gastroenterostomy                                                 |          |                |         |         |
| PPX 4466 Other procedures for creation of esophagogastric sphincteric competence        |          |                |         |         |
| PPX 4467 Laparoscopic procedures for creation of esophagogastric sphincteric competence |          |                |         |         |
| Procedure group H                                                                       | 2.2571   | 1.0522         | 2.1450  | 0.0320  |
| PPX 4561 Multiple segmental resection of small intestine                                |          |                |         |         |
| PPX 4563 Total removal of small intestine                                               |          |                |         |         |
| PPX 4571 Open and other multiple segmental resection of large intestine                 |          |                |         |         |
| PPX 4590 Intestinal anastomosis, not otherwise specified                                |          |                |         |         |
| PPX 4591 Small-to-small intestinal anastomosis                                          |          |                |         |         |
| PPX 4592 Anastomosis of small intestine to rectal stump                                 |          |                |         |         |
| PPX 4594 Large-to-large intestinal anastomosis                                          |          |                |         |         |
| PPX 4595 Anastomosis to anus                                                            |          |                |         |         |
| PPX 4601 Exteriorization of small intestine                                             |          |                |         |         |
| PPX 4679 Other repair of intestine                                                      |          |                |         |         |

| Variable                                                                                                           | Estimate | Standard Error | Z      | P-value |
|--------------------------------------------------------------------------------------------------------------------|----------|----------------|--------|---------|
| PPX 485 Other pull-through resection of rectum                                                                     |          |                |        |         |
| PPX 4862 Anterior resection of rectum with synchronous colostomy                                                   |          |                |        |         |
| PPX 4869 Other resection of rectum                                                                                 |          |                |        |         |
| PPX 4875 Abdominal proctopexy                                                                                      |          |                |        |         |
| PPX 4879 Other repair of rectum                                                                                    |          |                |        |         |
| Procedure group I                                                                                                  | 3.5759   | 1.2358         | 2.8936 | 0.0038  |
| PPX 4620 Ileostomy, not otherwise specified                                                                        |          |                |        |         |
| PPX 4621 Temporary ileostomy                                                                                       |          |                |        |         |
| PPX 4623 Other permanent ileostomy                                                                                 |          |                |        |         |
| Procedure group J                                                                                                  | 1.3203   | 1.0591         | 1.2466 | 0.2126  |
| PPX 4642 Repair of pericostomy hernia                                                                              |          |                |        |         |
| PPX 5300 Unilateral repair of inguinal hernia, not otherwise specified                                             |          |                |        |         |
| PPX 5301 Other and open repair of direct inguinal hernia                                                           |          |                |        |         |
| PPX 5302 Other and open repair of indirect inguinal hernia                                                         |          |                |        |         |
| PPX 5311 Other and open bilateral repair of direct inguinal hernia                                                 |          |                |        |         |
| PPX 5314 Other and open bilateral repair of direct inguinal hernia with graft or prosthesis                        |          |                |        |         |
| PPX 5315 Other and open bilateral repair of indirect inguinal hernia with graft or prosthesis                      |          |                |        |         |
| PPX 5316 Other and open bilateral repair of inguinal hernia, one direct and one indirect, with graft or prosthesis |          |                |        |         |
| PPX 5317 Bilateral inguinal hernia repair with graft or prosthesis, not otherwise specified                        |          |                |        |         |
| PPX 5329 Other unilateral femoral herniorrhaphy                                                                    |          |                |        |         |
| PPX 5341 Other and open repair of umbilical hernia with graft or prosthesis                                        |          |                |        |         |
| PPX 5349 Other open umbilical herniorrhaphy                                                                        |          |                |        |         |
| PPX 5351 Incisional hernia repair                                                                                  |          |                |        |         |
| PPX 5369 Other and open repair of other hernia of anterior abdominal wall with graft or prosthesis                 |          |                |        |         |
| PPX 537 Other and open repair of other hernia of anterior abdominal wall with graft or prosthesis                  |          |                |        |         |
| Procedure group K                                                                                                  | 1.8689   | 1.2033         | 1.5531 | 0.1204  |
| PPX 5022 Partial hepatectomy                                                                                       |          |                |        |         |
| PPX 5124 Laparoscopic partial cholecystectomy                                                                      |          |                |        |         |
| PPX 5137 Anastomosis of hepatic duct to gastrointestinal tract                                                     |          |                |        |         |
| PPX 5141 Common duct exploration for removal of calculus                                                           |          |                |        |         |
| PPX 415 Total splenectomy                                                                                          | 3.0118   | 1.0722         | 2.8090 | 0.0050  |
| PPX 4342 Local excision of other lesion or tissue of stomach                                                       | 2.4438   | 1.2119         | 2.0165 | 0.0437  |
| PPX 436 Partial gastrectomy with anastomosis to duodenum                                                           | 2.3693   | 1.4710         | 1.6107 | 0.1072  |
| PPX 437 Partial gastrectomy with anastomosis to jejunum                                                            | 2.2606   | 1.1008         | 2.0536 | 0.0400  |
| PPX 4399 Other total gastrectomy                                                                                   | 2.6834   | 1.1471         | 2.3393 | 0.0193  |
| PPX 4429 Other pyloroplasty                                                                                        | 2.6902   | 1.2242         | 2.1975 | 0.0280  |

| Variable                                                                             | Estimate | Standard Error | Z      | P-value |
|--------------------------------------------------------------------------------------|----------|----------------|--------|---------|
| PPX 4439 Other gastroenterostomy without gastrectomy                                 | 2.7507   | 1.0853         | 2.5346 | 0.0113  |
| PPX 4441 Suture of gastric ulcer site                                                | 3.5811   | 1.0790         | 3.3191 | 0.0009  |
| PPX 4442 Suture of duodenal ulcer site                                               | 3.1592   | 1.0644         | 2.9681 | 0.0030  |
| PPX 4469 Other repair of stomach                                                     | 3.0948   | 1.1845         | 2.6126 | 0.0090  |
| PPX 4562 Other partial resection of small intestine                                  | 2.7129   | 1.0359         | 2.6188 | 0.0088  |
| PPX 4572 Open and other cecectomy                                                    | 2.3825   | 1.0941         | 2.1777 | 0.0294  |
| PPX 4573 Open and other right hemicolectomy                                          | 2.0967   | 1.0337         | 2.0284 | 0.0425  |
| PPX 4574 Open and other resection of transverse colon                                | 1.8192   | 1.1066         | 1.6440 | 0.1002  |
| PPX 4575 Open and other left hemicolectomy                                           | 2.4348   | 1.0443         | 2.3315 | 0.0197  |
| PPX 4576 Open and other sigmoidectomy                                                | 2.4521   | 1.0374         | 2.3637 | 0.0181  |
| PPX 4579 Other and unspecified partial excision of large intestine                   | 2.5249   | 1.0575         | 2.3876 | 0.0170  |
| PPX 458 Other and unspecified partial excision of large intestine                    | 3.1493   | 1.0638         | 2.9604 | 0.0031  |
| PPX 4593 Other small-to-large intestinal anastomosis                                 | 3.4830   | 1.1638         | 2.9929 | 0.0028  |
| PPX 4603 Exteriorization of large intestine                                          | 2.4709   | 1.0840         | 2.2795 | 0.0226  |
| PPX 4610 Colostomy, not otherwise specified                                          | 2.1506   | 1.1349         | 1.8949 | 0.0581  |
| PPX 4611 Temporary colostomy                                                         | 3.0832   | 1.2425         | 2.4815 | 0.0131  |
| PPX 4613 Permanent colostomy                                                         | 2.8517   | 1.1870         | 2.4025 | 0.0163  |
| PPX 4639 Other enterostomy                                                           | 3.2038   | 1.1024         | 2.9061 | 0.0037  |
| PPX 4673 Suture of laceration of small intestine, except duodenum                    | 1.4675   | 1.2663         | 1.1589 | 0.2465  |
| PPX 4675 Suture of laceration of large intestine                                     | 1.9698   | 1.2860         | 1.5317 | 0.1256  |
| PPX 4701 Laparoscopic appendectomy                                                   | 0.5288   | 1.1877         | 0.4452 | 0.6562  |
| PPX 4709 Other appendectomy                                                          | 1.6253   | 1.0809         | 1.5037 | 0.1327  |
| PPX 4849 Other pull-through resection of rectum                                      | 1.4432   | 1.4532         | 0.9931 | 0.3207  |
| PPX 4863 Other anterior resection of rectum                                          | 1.5437   | 1.1008         | 1.4024 | 0.1608  |
| PPX 4876 Other proctopexy                                                            | 1.1848   | 1.4548         | 0.8144 | 0.4154  |
| PPX 5029 Other destruction of lesion of liver                                        | 2.0090   | 1.2073         | 1.6641 | 0.0961  |
| PPX 503 Lobectomy of liver                                                           | 2.5060   | 1.3016         | 1.9253 | 0.0542  |
| PPX 5122 Cholecystectomy                                                             | 1.7448   | 1.0406         | 1.6766 | 0.0936  |
| PPX 5123 Laparoscopic cholecystectomy                                                | 0.7542   | 1.0378         | 0.7268 | 0.4674  |
| PPX 5132 Anastomosis of gallbladder to intestine                                     | 3.0358   | 1.3247         | 2.2917 | 0.0219  |
| PPX 5136 Choledochenterostomy                                                        | 1.9538   | 1.1765         | 1.6607 | 0.0968  |
| PPX 5151 Exploration of common duct                                                  | 2.9166   | 1.6234         | 1.7966 | 0.0724  |
| PPX 5252 Distal pancreatectomy                                                       | 1.3841   | 1.4575         | 0.9497 | 0.3423  |
| PPX 5259 Other partial pancreatectomy                                                | 3.4507   | 1.3349         | 2.5850 | 0.0097  |
| PPX 5303 Other and open repair of direct inguinal hernia with graft or prosthesis    | 1.1392   | 1.1517         | 0.9892 | 0.3226  |
| PPX 5304 Other and open repair of indirect inguinal hernia with graft or prosthesis  | 1.5932   | 1.1176         | 1.4255 | 0.1540  |
| PPX 5305 Repair of inguinal hernia with graft or prosthesis, not otherwise specified | 1.2178   | 1.1193         | 1.0880 | 0.2766  |
| PPX 5321 Unilateral repair of femoral hernia with graft or prosthesis                | 1.0102   | 1.4631         | 0.6905 | 0.4899  |
| PPX 5359 Repair of other hernia of anterior abdominal wall                           | 2.5971   | 1.1292         | 2.3000 | 0.0214  |
| PPX 5361 Other open incisional hernia repair with graft or prosthesis                | 0.4602   | 1.1820         | 0.3893 | 0.6970  |
| PPX 5451 Laparoscopic lysis of peritoneal adhesions                                  | 2.0369   | 1.0993         | 1.8530 | 0.0639  |
| PPX 5459 Other lysis of peritoneal adhesions                                         | 2.0646   | 1.0401         | 1.9850 | 0.0471  |
| PPX 5493 Creation of cutaneousperitoneal fistula (reference)                         | --       | --             | --     | --      |

**Appendix 2b. General Surgery Probability of Death Model, Recent Era (2013 – 2015)**

| Variable                                   | Estimate | Standard Error | Z       | P-value |
|--------------------------------------------|----------|----------------|---------|---------|
| Model Intercept                            | -7.7623  | 0.8017         | -9.6828 | <0.0001 |
| California                                 | 0.3315   | 0.1497         | 2.2139  | 0.0268  |
| New Jersey                                 | -0.1393  | 0.1756         | -0.7933 | 0.4276  |
| Florida                                    | 0.1251   | 0.1441         | 0.8681  | 0.3854  |
| Pennsylvania (reference)                   | --       | --             | --      | --      |
| Matched in year 2013                       | 0.1045   | 0.1399         | 0.7471  | 0.4550  |
| Matched in year 2014                       | 0.0721   | 0.1185         | 0.6089  | 0.5426  |
| Matched in year 2015 (reference)           | --       | --             | --      | --      |
| Sex (male)                                 | -0.0090  | 0.1104         | -0.0814 | 0.9351  |
| Age                                        | 0.0416   | 0.0072         | 5.7736  | <0.0001 |
| CHF                                        | 0.2393   | 0.1219         | 1.9622  | 0.0497  |
| Stroke                                     | -0.0126  | 0.1395         | -0.0906 | 0.9278  |
| Seizure                                    | -0.0154  | 0.2886         | -0.0535 | 0.9573  |
| Dementia                                   | 0.4284   | 0.1287         | 3.3272  | 0.0009  |
| History of Alcoholism                      | -0.1263  | 0.2953         | -0.4278 | 0.6688  |
| History of Drug Abuse                      | -0.0203  | 0.3839         | -0.0529 | 0.9578  |
| Past Myocardial Infarction                 | 0.0107   | 0.1495         | 0.0716  | 0.9429  |
| Past Arrhythmia                            | 0.0830   | 0.1118         | 0.7426  | 0.4577  |
| Unstable Angina                            | 0.2467   | 0.3129         | 0.7883  | 0.4305  |
| Angina                                     | -0.5536  | 0.2582         | -2.1440 | 0.0320  |
| Hypertension                               | -0.0763  | 0.1818         | -0.4198 | 0.6746  |
| Valvular Disease                           | 0.1184   | 0.1120         | 1.0578  | 0.2901  |
| Chronic Lung Disease                       | 0.4589   | 0.1106         | 4.1506  | <0.0001 |
| Asthma                                     | -0.1091  | 0.1590         | -0.6860 | 0.4927  |
| Liver Disease                              | 0.5820   | 0.1194         | 4.8736  | <0.0001 |
| Renal Dysfunction                          | 1.1303   | 0.1150         | 9.8244  | <0.0001 |
| Renal Failure                              | 0.1711   | 0.1590         | 1.0755  | 0.2821  |
| Diabetes                                   | 0.1249   | 0.1093         | 1.1428  | 0.2531  |
| Paraplegia                                 | 0.0670   | 0.2688         | 0.2494  | 0.8030  |
| Collagen Vascular Disease                  | 0.2492   | 0.1744         | 1.4292  | 0.1530  |
| Coagulopathy                               | -0.1183  | 0.4831         | -0.2448 | 0.8066  |
| Thrombocytopenia                           | 0.0510   | 0.2180         | 0.2338  | 0.8151  |
| Other Coagulopathy                         | 0.7014   | 0.1542         | 4.5493  | <0.0001 |
| Smoking History                            | 0.0218   | 0.1156         | 0.1886  | 0.8504  |
| Post-Inflammatory Pulmonary Fibrosis       | 0.0723   | 0.2204         | 0.3282  | 0.7428  |
| Cushings' Disease                          | 0.3809   | 0.8855         | 0.4301  | 0.6671  |
| Graves' Disease                            | 0.0801   | 0.8185         | 0.0979  | 0.9220  |
| Cancer                                     | -0.0656  | 0.1134         | -0.5786 | 0.5629  |
| Abdominal Cancer                           | 0.9023   | 0.2241         | 4.0261  | <0.0001 |
| Hypothyroidism                             | -0.0225  | 0.1144         | -0.1963 | 0.8444  |
| Chronic Peptic Ulcer                       | 0.1119   | 0.6082         | 0.1841  | 0.8540  |
| HIV and AIDS                               | -0.8002  | 1.1514         | -0.6950 | 0.4871  |
| Weight loss                                | 0.4314   | 0.1102         | 3.9142  | <0.0001 |
| Major Secondary Procedure                  | 0.0619   | 0.1198         | 0.5169  | 0.6052  |
| Emergency admission                        | 0.6757   | 0.1238         | 5.4589  | <0.0001 |
| Transfer-in status                         | 0.3007   | 0.3961         | 0.7590  | 0.4479  |
| Procedure group A                          | -0.2747  | 1.1573         | -0.2374 | 0.8123  |
| PPX 062 Unilateral thyroid lobectomy       |          |                |         |         |
| PPX 0631 Excision of lesion of thyroid     |          |                |         |         |
| PPX 0639 Other partial thyroidectomy       |          |                |         |         |
| PPX 0651 Partial substernal thyroidectomy  |          |                |         |         |
| PPX 0652 Complete substernal thyroidectomy |          |                |         |         |
| Procedure group B                          | -2.3159  | 1.1410         | -2.0297 | 0.0424  |
| PPX 4642 Repair of pericostomy hernia      |          |                |         |         |



| Variable                                                                                                           | Estimate | Standard Error | Z       | P-value |
|--------------------------------------------------------------------------------------------------------------------|----------|----------------|---------|---------|
| PPX 5301 Other and open repair of direct inguinal hernia                                                           |          |                |         |         |
| PPX 5302 Other and open repair of indirect inguinal hernia                                                         |          |                |         |         |
| PPX 5303 Other and open repair of direct inguinal hernia with graft or prosthesis                                  |          |                |         |         |
| PPX 5310 Bilateral repair of inguinal hernia, not otherwise specified                                              |          |                |         |         |
| PPX 5314 Other and open bilateral repair of direct inguinal hernia with graft or prosthesis                        |          |                |         |         |
| PPX 5315 Other and open bilateral repair of indirect inguinal hernia with graft or prosthesis                      |          |                |         |         |
| PPX 5316 Other and open bilateral repair of inguinal hernia, one direct and one indirect, with graft or prosthesis |          |                |         |         |
| PPX 5317 Bilateral inguinal hernia repair with graft or prosthesis, not otherwise specified                        |          |                |         |         |
| PPX 5372 Other and open repair of diaphragmatic hernia, abdominal approach                                         |          |                |         |         |
| PPX 5375 Repair of diaphragmatic hernia, abdominal approach, not otherwise specified                               |          |                |         |         |
| Procedure group C                                                                                                  | -1.6660  | 1.1601         | -1.4360 | 0.1510  |
| PPX 4849 Other pull-through resection of rectum                                                                    |          |                |         |         |
| PPX 4850 Abdominoperineal resection of the rectum, not otherwise specified                                         |          |                |         |         |
| PPX 4851 Laparoscopic abdominoperineal resection of the rectum                                                     |          |                |         |         |
| PPX 4852 Open abdominoperineal resection of the rectum                                                             |          |                |         |         |
| PPX 4859 Other abdominoperineal resection of the rectum                                                            |          |                |         |         |
| PPX 4875 Abdominal proctopexy                                                                                      |          |                |         |         |
| PPX 4879 Other repair of rectum                                                                                    |          |                |         |         |
| Procedure group D                                                                                                  | -0.9970  | 1.2005         | -0.8305 | 0.4063  |
| PPX 5029 Other destruction of lesion of liver                                                                      |          |                |         |         |
| PPX 503 Lobectomy of liver                                                                                         |          |                |         |         |
| Procedure group E                                                                                                  | 0.2661   | 0.9691         | 0.2745  | 0.7837  |
| PPX 5132 Anastomosis of gallbladder to intestine                                                                   |          |                |         |         |
| PPX 5136 Choledochoenterostomy                                                                                     |          |                |         |         |
| PPX 5137 Anastomosis of hepatic duct to gastrointestinal tract                                                     |          |                |         |         |
| PPX 5141 Common duct exploration for removal of calculus                                                           |          |                |         |         |
| PPX 5151 Exploration of common duct                                                                                |          |                |         |         |
| Procedure group F                                                                                                  | -1.0675  | 0.9243         | -1.1550 | 0.2481  |
| PPX 5252 Distal pancreatectomy                                                                                     |          |                |         |         |
| PPX 5253 Radical subtotal pancreatectomy                                                                           |          |                |         |         |
| PPX 5259 Other partial pancreatectomy                                                                              |          |                |         |         |
| PPX 526 Total pancreatectomy                                                                                       |          |                |         |         |
| Procedure group G                                                                                                  | 0.2143   | 0.8537         | 0.2511  | 0.8018  |
| PPX 4674 Closure of fistula of small intestine, except duodenum                                                    |          |                |         |         |
| PPX 7072 Repair of colovaginal fistula                                                                             |          |                |         |         |
| PPX 7073 Repair of rectovaginal fistula                                                                            |          |                |         |         |
| Procedure group H                                                                                                  | -1.1694  | 1.1822         | -0.9892 | 0.3226  |

| Variable                                                                                                         | Estimate | Standard Error | Z       | P-value |
|------------------------------------------------------------------------------------------------------------------|----------|----------------|---------|---------|
| PPX 0681 Complete parathyroidectomy                                                                              |          |                |         |         |
| PPX 0689 Other parathyroidectomy                                                                                 |          |                |         |         |
| Procedure group I                                                                                                | 0.0563   | 1.1676         | 0.0482  | 0.9616  |
| PPX 0722 Unilateral adrenalectomy                                                                                |          |                |         |         |
| PPX 073 Bilateral adrenalectomy                                                                                  |          |                |         |         |
| Procedure group J                                                                                                | -0.5525  | 0.9042         | -0.6110 | 0.5412  |
| PPX 1711 Laparoscopic repair of direct inguinal hernia with graft or prosthesis                                  |          |                |         |         |
| PPX 1712 Laparoscopic repair of indirect inguinal hernia with graft or prosthesis                                |          |                |         |         |
| PPX 1713 Laparoscopic repair of inguinal hernia with graft or prosthesis, not otherwise specified                |          |                |         |         |
| PPX 1722 Laparoscopic bilateral repair of indirect inguinal hernia with graft or prosthesis                      |          |                |         |         |
| PPX 1723 Laparoscopic bilateral repair of inguinal hernia, one direct and one indirect, with graft or prosthesis |          |                |         |         |
| PPX 1724 Laparoscopic bilateral repair of inguinal hernia with graft or prosthesis, not otherwise specified      |          |                |         |         |
| Procedure group K                                                                                                | -0.6918  | 0.9045         | -0.7648 | 0.4444  |
| PPX 1731 Laparoscopic multiple segmental resection of large intestine                                            |          |                |         |         |
| PPX 1732 Laparoscopic cecectomy                                                                                  |          |                |         |         |
| PPX 1734 Laparoscopic resection of transverse colon                                                              |          |                |         |         |
| PPX 1739 Other laparoscopic partial excision of large intestine                                                  |          |                |         |         |
| Procedure group L                                                                                                | 0.1235   | 0.7115         | 0.1736  | 0.8622  |
| PPX 4240 Esophagectomy, not otherwise specified                                                                  |          |                |         |         |
| PPX 4241 Partial esophagectomy                                                                                   |          |                |         |         |
| PPX 4242 Total esophagectomy                                                                                     |          |                |         |         |
| PPX 427 Esophagomyotomy                                                                                          |          |                |         |         |
| PPX 437 Partial gastrectomy with anastomosis to jejunum                                                          |          |                |         |         |
| Procedure group M                                                                                                | -0.1994  | 0.6657         | -0.2995 | 0.7646  |
| PPX 4342 Local excision of other lesion or tissue of stomach                                                     |          |                |         |         |
| PPX 435 Partial gastrectomy with anastomosis to esophagus                                                        |          |                |         |         |
| PPX 436 Partial gastrectomy with anastomosis to duodenum                                                         |          |                |         |         |
| PPX 4439 Other gastroenterostomy without gastrectomy                                                             |          |                |         |         |
| PPX 4466 Other procedures for creation of esophagogastric sphincteric competence                                 |          |                |         |         |
| PPX 4467 Laparoscopic procedures for creation of esophagogastric sphincteric competence                          |          |                |         |         |
| PPX 4469 Other repair of stomach                                                                                 |          |                |         |         |
| Procedure group N                                                                                                | -1.1856  | 0.9060         | -1.3087 | 0.1906  |
| PPX 4561 Multiple segmental resection of small intestine                                                         |          |                |         |         |
| PPX 4563 Total removal of small intestine                                                                        |          |                |         |         |
| PPX 4590 Intestinal anastomosis, not otherwise specified                                                         |          |                |         |         |

| Variable                                                                | Estimate | Standard Error | Z       | P-value |
|-------------------------------------------------------------------------|----------|----------------|---------|---------|
| PPX 4592 Anastomosis of small intestine to rectal stump                 |          |                |         |         |
| PPX 4594 Large-to-large intestinal anastomosis                          |          |                |         |         |
| PPX 4595 Anastomosis to anus                                            |          |                |         |         |
| PPX 4675 Suture of laceration of large intestine                        |          |                |         |         |
| PPX 4679 Other repair of intestine                                      |          |                |         |         |
| Procedure group O                                                       | -1.0196  | 0.8944         | -1.1399 | 0.2543  |
| PPX 4611 Temporary colostomy                                            |          |                |         |         |
| PPX 4613 Permanent colostomy                                            |          |                |         |         |
| PPX 4623 Other permanent ileostomy                                      |          |                |         |         |
| PPX 4651 Closure of stoma of small intestine                            |          |                |         |         |
| PPX 064 Complete thyroidectomy                                          | -0.5763  | 1.1630         | -0.4955 | 0.6202  |
| PPX 1733 Laparoscopic right hemicolectomy                               | -1.1528  | 0.6754         | -1.7069 | 0.0878  |
| PPX 1735 Laparoscopic left hemicolectomy                                | 0.6794   | 0.7159         | 0.9490  | 0.3426  |
| PPX 1736 Laparoscopic sigmoidectomy                                     | -0.9619  | 0.8042         | -1.1961 | 0.2317  |
| PPX 415 Total splenectomy                                               | 0.8942   | 0.6826         | 1.3099  | 0.1902  |
| PPX 4389 Open and other partial gastrectomy                             | 0.6574   | 0.7550         | 0.8708  | 0.3839  |
| PPX 4399 Other total gastrectomy                                        | 1.0261   | 0.8420         | 1.2187  | 0.2229  |
| PPX 4429 Other pyloroplasty                                             | 1.5076   | 0.9525         | 1.5828  | 0.1135  |
| PPX 4438 Laparoscopic gastroenterostomy                                 | -0.6614  | 1.1515         | -0.5744 | 0.5657  |
| PPX 4441 Suture of gastric ulcer site                                   | 0.9163   | 0.6697         | 1.3681  | 0.1713  |
| PPX 4442 Suture of duodenal ulcer site                                  | 0.8538   | 0.6309         | 1.3533  | 0.1760  |
| PPX 4562 Other partial resection of small intestine                     | 0.4726   | 0.5455         | 0.8664  | 0.3863  |
| PPX 4571 Open and other multiple segmental resection of large intestine | 0.0111   | 1.2477         | 0.0089  | 0.9929  |
| PPX 4572 Open and other cecectomy                                       | 0.7480   | 0.6868         | 1.0891  | 0.2761  |
| PPX 4573 Open and other right hemicolectomy                             | 0.1113   | 0.5510         | 0.2021  | 0.8399  |
| PPX 4574 Open and other resection of transverse colon                   | 0.7098   | 0.6710         | 1.0578  | 0.2901  |
| PPX 4575 Open and other left hemicolectomy                              | 1.0367   | 0.5819         | 1.7817  | 0.0748  |
| PPX 4576 Open and other sigmoidectomy                                   | 0.4278   | 0.5561         | 0.7694  | 0.4417  |
| PPX 4579 Other and unspecified partial excision of large intestine      | 0.8866   | 0.6292         | 1.4090  | 0.1588  |
| PPX 4581 Laparoscopic total intra-abdominal colectomy                   | 1.1386   | 0.9732         | 1.1701  | 0.2420  |
| PPX 4582 Open total intra-abdominal colectomy                           | 1.0919   | 0.6580         | 1.6596  | 0.0970  |
| PPX 4583 Other and unspecified total intra-abdominal colectomy          | 0.7183   | 1.0545         | 0.6812  | 0.4958  |
| PPX 4591 Small-to-small intestinal anastomosis                          | 1.2047   | 0.9894         | 1.2176  | 0.2234  |
| PPX 4593 Other small-to-large intestinal anastomosis                    | 0.0224   | 0.8288         | 0.0270  | 0.9784  |
| PPX 4601 Exteriorization of small intestine                             | 1.1925   | 0.8477         | 1.4067  | 0.1595  |
| PPX 4603 Exteriorization of large intestine                             | 0.3678   | 0.6649         | 0.5532  | 0.5801  |
| PPX 4610 Colostomy, not otherwise specified                             | 0.5630   | 0.6561         | 0.8581  | 0.3908  |
| PPX 4620 Ileostomy, not otherwise specified                             | 0.9933   | 1.0229         | 0.9710  | 0.3315  |
| PPX 4639 Other enterostomy                                              | 0.1309   | 0.8126         | 0.1611  | 0.8720  |
| PPX 4652 Closure of stoma of large intestine                            | -0.9321  | 0.8942         | -1.0424 | 0.2972  |
| PPX 4673 Suture of laceration of small intestine, except duodenum       | 1.7739   | 0.9402         | 1.8868  | 0.0592  |
| PPX 4701 Laparoscopic appendectomy                                      | -1.3858  | 0.6984         | -1.9841 | 0.0472  |
| PPX 4709 Other appendectomy                                             | -0.7078  | 0.8033         | -0.8811 | 0.3783  |
| PPX 4862 Anterior resection of rectum with synchronous colostomy        | 0.7268   | 0.7917         | 0.9180  | 0.3586  |
| PPX 4863 Other anterior resection of rectum                             | 0.4889   | 0.7076         | 0.6908  | 0.4897  |
| PPX 4869 Other resection of rectum                                      | -0.0869  | 0.8376         | -0.1037 | 0.9174  |
| PPX 4876 Other proctopexy                                               | -0.0503  | 0.9261         | -0.0543 | 0.9567  |
| PPX 5022 Partial hepatectomy                                            | -1.3673  | 1.1679         | -1.1707 | 0.2417  |

| Variable                                                                                           | Estimate | Standard Error | Z       | P-value |
|----------------------------------------------------------------------------------------------------|----------|----------------|---------|---------|
| PPX 5122 Cholecystectomy                                                                           | -0.4858  | 0.5824         | -0.8342 | 0.4042  |
| PPX 5123 Laparoscopic cholecystectomy                                                              | -1.3210  | 0.5504         | -2.4000 | 0.0164  |
| PPX 5124 Laparoscopic partial cholecystectomy                                                      | 1.1650   | 1.3361         | 0.8720  | 0.3832  |
| PPX 527 Radical pancreaticoduodenectomy                                                            | -1.5958  | 0.8241         | -1.9365 | 0.0528  |
| PPX 5300 Unilateral repair of inguinal hernia, not otherwise specified                             | -0.5208  | 0.9271         | -0.5617 | 0.5743  |
| PPX 5304 Other and open repair of indirect inguinal hernia with graft or prosthesis                | -1.6579  | 1.1455         | -1.4473 | 0.1478  |
| PPX 5305 Repair of inguinal hernia with graft or prosthesis, not otherwise specified               | -1.2153  | 0.8939         | -1.3596 | 0.1740  |
| PPX 5321 Unilateral repair of femoral hernia with graft or prosthesis                              | 0.9374   | 0.7410         | 1.2650  | 0.2059  |
| PPX 5329 Other unilateral femoral herniorrhaphy                                                    | -0.3655  | 0.9201         | -0.3972 | 0.6912  |
| PPX 5341 Other and open repair of umbilical hernia with graft or prosthesis                        | -0.9571  | 1.1569         | -0.8273 | 0.4081  |
| PPX 5349 Other open umbilical herniorrhaphy                                                        | -0.1153  | 0.8207         | -0.1405 | 0.8883  |
| PPX 5351 Incisional hernia repair                                                                  | -0.4205  | 0.7563         | -0.5560 | 0.5782  |
| PPX 5359 Repair of other hernia of anterior abdominal wall                                         | -0.2605  | 0.9126         | -0.2855 | 0.7753  |
| PPX 5361 Other open incisional hernia repair with graft or prosthesis                              | -1.1610  | 0.7296         | -1.5913 | 0.1115  |
| PPX 5369 Other and open repair of other hernia of anterior abdominal wall with graft or prosthesis | -0.3512  | 0.8141         | -0.4314 | 0.6662  |
| PPX 5451 Laparoscopic lysis of peritoneal adhesions                                                | -0.7093  | 0.7074         | -1.0027 | 0.3160  |
| PPX 5459 Other lysis of peritoneal adhesions                                                       | -0.2415  | 0.5658         | -0.4268 | 0.6695  |
| PPX 5493 Creation of cutaneoperitoneal fistula (reference)                                         | --       | --             | --      | --      |

**Table 3. Complete balance table for Early Era (2003-2005)**

| Variable                                                                                  | Black Patients | Tapered Matches                         |                          |              | White Patients (unmatched) |
|-------------------------------------------------------------------------------------------|----------------|-----------------------------------------|--------------------------|--------------|----------------------------|
|                                                                                           |                | Presentation + Procedure + Demographics | Procedure + Demographics | Demographics |                            |
| N                                                                                         | 6,752          | 6,752                                   | 6,752                    | 6,752        | 107,001                    |
| Age                                                                                       | 75.99          | 75.84                                   | 75.98                    | 75.99        | 77.48                      |
| Year of match                                                                             | 2005.12        | 2005.10                                 | 2005.12                  | 2005.12      | 2005.12                    |
| Age 65-69 (%)                                                                             | 0.25           | 0.23                                    | 0.25                     | 0.25         | 0.18                       |
| Age 70-74 (%)                                                                             | 0.24           | 0.25                                    | 0.25                     | 0.24         | 0.21                       |
| Age 75-79 (%)                                                                             | 0.21           | 0.24                                    | 0.21                     | 0.21         | 0.24                       |
| Age 80-84 (%)                                                                             | 0.16           | 0.17                                    | 0.16                     | 0.16         | 0.21                       |
| Age 85 plus (%)                                                                           | 0.13           | 0.11                                    | 0.13                     | 0.13         | 0.17                       |
| State- California (%)                                                                     | 0.23           | 0.23                                    | 0.23                     | 0.23         | 0.25                       |
| State- New Jersey (%)                                                                     | 0.24           | 0.27                                    | 0.23                     | 0.24         | 0.16                       |
| State- Florida (%)                                                                        | 0.34           | 0.34                                    | 0.34                     | 0.34         | 0.35                       |
| State- Pennsylvania (%)                                                                   | 0.19           | 0.16                                    | 0.19                     | 0.19         | 0.24                       |
| State- NJ/PA (%)                                                                          | 0.43           | 0.43                                    | 0.43                     | 0.43         | 0.40                       |
| Male (%)                                                                                  | 0.39           | 0.39                                    | 0.39                     | 0.39         | 0.43                       |
| Year of match- 2004 (%)                                                                   | 0.22           | 0.23                                    | 0.22                     | 0.22         | 0.22                       |
| Year of match- 2005 (%)                                                                   | 0.44           | 0.45                                    | 0.44                     | 0.44         | 0.45                       |
| Year of match- 2006 (%)                                                                   | 0.34           | 0.32                                    | 0.34                     | 0.34         | 0.33                       |
| Open and other cecectomy                                                                  | 0.01           | 0.01                                    | 0.01                     | 0.01         | 0.01                       |
| Laparoscopic cholecystectomy                                                              | 0.16           | 0.16                                    | 0.16                     | 0.21         | 0.20                       |
| Open and other right hemicolectomy                                                        | 0.14           | 0.14                                    | 0.14                     | 0.11         | 0.12                       |
| Other anterior resection of rectum                                                        | 0.01           | 0.01                                    | 0.01                     | 0.02         | 0.02                       |
| Cholecystectomy                                                                           | 0.06           | 0.06                                    | 0.06                     | 0.05         | 0.05                       |
| Open and other sigmoidectomy                                                              | 0.05           | 0.05                                    | 0.05                     | 0.06         | 0.07                       |
| Other and open repair of other hernia of anterior abdominal wall with graft or prosthesis | 0.00           | 0.00                                    | 0.00                     | 0.01         | 0.01                       |
| Radical pancreaticoduodenectomy                                                           | 0.01           | 0.01                                    | 0.01                     | 0.01         | 0.01                       |
| Other partial resection of small intestine                                                | 0.06           | 0.06                                    | 0.06                     | 0.05         | 0.05                       |
| Other lysis of peritoneal adhesions                                                       | 0.06           | 0.06                                    | 0.06                     | 0.05         | 0.05                       |
| Other resection of rectum                                                                 | 0.00           | 0.00                                    | 0.00                     | 0.00         | 0.01                       |
| Other and open repair of indirect inguinal hernia with graft or prosthesis                | 0.01           | 0.01                                    | 0.01                     | 0.01         | 0.01                       |
| Distal pancreatectomy                                                                     | 0.00           | 0.00                                    | 0.00                     | 0.00         | 0.00                       |

|                                                                         |      |      |      |      |      |
|-------------------------------------------------------------------------|------|------|------|------|------|
| Closure of stoma of small intestine                                     | 0.00 | 0.00 | 0.00 | 0.00 | 0.00 |
| Other unilateral femoral herniorrhaphy                                  | NR   | NR   | NR   | 0.00 | 0.00 |
| Open and other left hemicolectomy                                       | 0.04 | 0.04 | 0.04 | 0.03 | 0.03 |
| Other and unspecified partial excision of large intestine               | 0.01 | 0.01 | 0.01 | 0.01 | 0.01 |
| Unilateral adrenalectomy                                                | 0.00 | 0.00 | 0.00 | 0.00 | 0.00 |
| Abdominal proctopexy                                                    | NR   | NR   | NR   | NR   | 0.00 |
| Other gastroenterostomy without gastrectomy                             | 0.01 | 0.01 | 0.01 | 0.01 | 0.01 |
| Exteriorization of large intestine                                      | 0.01 | 0.01 | 0.01 | 0.01 | 0.01 |
| Anterior resection of rectum with synchronous colostomy                 | 0.00 | 0.00 | 0.00 | 0.00 | 0.00 |
| Total splenectomy                                                       | 0.00 | 0.00 | 0.00 | 0.01 | 0.01 |
| Other procedures for creation of esophagogastric sphincteric competence | NR   | NR   | NR   | 0.00 | 0.00 |
| Other total gastrectomy                                                 | 0.01 | 0.01 | 0.01 | 0.00 | 0.00 |
| Other and unspecified partial excision of large intestine               | 0.02 | 0.02 | 0.02 | 0.02 | 0.02 |
| Other pull-through resection of rectum                                  | 0.01 | 0.01 | 0.01 | 0.01 | 0.01 |
| Other open umbilical herniorrhaphy                                      | 0.01 | 0.01 | 0.01 | 0.00 | 0.00 |
| Laparoscopic appendectomy                                               | 0.01 | 0.01 | 0.01 | 0.02 | 0.02 |
| Complete parathyroidectomy                                              | 0.00 | 0.00 | 0.00 | NR   | 0.00 |
| Incisional hernia repair                                                | 0.01 | 0.01 | 0.01 | 0.01 | 0.01 |
| Temporary colostomy                                                     | 0.00 | 0.00 | 0.00 | NR   | 0.00 |
| Repair of rectovaginal fistula                                          | NR   | NR   | NR   | NR   | 0.00 |
| Other pull-through resection of rectum                                  | NR   | NR   | NR   | NR   | 0.00 |
| Other destruction of lesion of liver                                    | 0.00 | 0.00 | 0.00 | 0.00 | 0.00 |
| Small-to-small intestinal anastomosis                                   | 0.00 | 0.00 | 0.00 | NR   | 0.00 |
| Other open incisional hernia repair with graft or prosthesis            | 0.02 | 0.02 | 0.02 | 0.03 | 0.03 |
| Partial esophagectomy                                                   | NR   | NR   | NR   | 0.00 | 0.00 |
| Laparoscopic gastroenterostomy                                          | 0.00 | 0.00 | 0.00 | 0.00 | 0.00 |

|                                                                                           |      |      |      |      |      |
|-------------------------------------------------------------------------------------------|------|------|------|------|------|
| Open and other resection of transverse colon                                              | 0.01 | 0.01 | 0.01 | 0.01 | 0.01 |
| Exteriorization of small intestine                                                        | 0.00 | 0.00 | 0.00 | 0.00 | 0.00 |
| Other enterostomy                                                                         | 0.01 | 0.01 | 0.01 | 0.00 | 0.00 |
| Unilateral thyroid lobectomy                                                              | 0.02 | 0.02 | 0.02 | 0.01 | 0.01 |
| Complete thyroidectomy                                                                    | 0.02 | 0.02 | 0.02 | 0.01 | 0.01 |
| Partial gastrectomy with anastomosis to duodenum                                          | 0.00 | 0.00 | 0.00 | NR   | 0.00 |
| Other and open repair of direct inguinal hernia with graft or prosthesis                  | 0.01 | 0.01 | 0.01 | 0.01 | 0.01 |
| Other parathyroidectomy                                                                   | 0.02 | 0.02 | 0.02 | 0.01 | 0.01 |
| Laparoscopic lysis of peritoneal adhesions                                                | 0.01 | 0.01 | 0.01 | 0.01 | 0.01 |
| Lobectomy of liver                                                                        | 0.00 | 0.00 | 0.00 | NR   | 0.00 |
| Anastomosis of hepatic duct to gastrointestinal tract                                     | NR   | NR   | NR   | NR   | 0.00 |
| Suture of laceration of large intestine                                                   | NR   | NR   | NR   | NR   | 0.00 |
| Repair of pericostomy hernia                                                              | NR   | NR   | NR   | 0.00 | 0.00 |
| Common duct exploration for removal of calculus                                           | NR   | NR   | NR   | NR   | 0.00 |
| Total esophagectomy                                                                       | NR   | NR   | NR   | NR   | 0.00 |
| Open and other partial gastrectomy                                                        | 0.01 | 0.01 | 0.01 | 0.00 | 0.00 |
| Partial hepatectomy                                                                       | 0.00 | 0.00 | 0.00 | 0.00 | 0.00 |
| Esophagectomy, not otherwise specified                                                    | NR   | NR   | NR   | 0.00 | 0.00 |
| Other and open repair of other hernia of anterior abdominal wall with graft or prosthesis | 0.01 | 0.01 | 0.01 | 0.01 | 0.01 |
| Laparoscopic procedures for creation of esophagogastric sphincteric competence            | NR   | NR   | NR   | 0.01 | 0.01 |
| Closure of stoma of large intestine                                                       | 0.00 | 0.00 | 0.00 | 0.01 | 0.01 |
| Resection of vessel with replacement, other vessels of head and neck                      | 0.00 | 0.00 | 0.00 | 0.00 | 0.00 |
| Other repair of intestine                                                                 | 0.00 | 0.00 | 0.00 | NR   | 0.00 |
| Bilateral inguinal hernia repair with graft or prosthesis, not otherwise specified        | NR   | NR   | NR   | NR   | 0.00 |

|                                                                                      |      |      |      |      |      |
|--------------------------------------------------------------------------------------|------|------|------|------|------|
| Esophagomyotomy                                                                      | 0.00 | 0.00 | 0.00 | NR   | 0.00 |
| Other appendectomy                                                                   | 0.01 | 0.01 | 0.01 | 0.02 | 0.02 |
| Local excision of other lesion or tissue of stomach                                  | 0.00 | 0.00 | 0.00 | NR   | 0.00 |
| Unilateral repair of femoral hernia with graft or prosthesis                         | 0.00 | 0.00 | 0.00 | 0.00 | 0.00 |
| Ileostomy, not otherwise specified                                                   | NR   | NR   | NR   | NR   | 0.00 |
| Partial gastrectomy with anastomosis to jejunum                                      | 0.02 | 0.02 | 0.02 | 0.01 | 0.01 |
| Other small-to-large intestinal anastomosis                                          | 0.00 | 0.00 | 0.00 | NR   | 0.00 |
| Other and open repair of indirect inguinal hernia                                    | 0.00 | 0.00 | 0.00 | 0.00 | 0.00 |
| Repair of other hernia of anterior abdominal wall                                    | 0.01 | 0.01 | 0.01 | 0.00 | 0.00 |
| Repair of inguinal hernia with graft or prosthesis, not otherwise specified          | 0.01 | 0.01 | 0.01 | 0.01 | 0.01 |
| Large-to-large intestinal anastomosis                                                | 0.00 | 0.00 | 0.00 | 0.00 | 0.00 |
| Suture of duodenal ulcer site                                                        | 0.01 | 0.01 | 0.01 | 0.01 | 0.01 |
| Colostomy, not otherwise specified                                                   | 0.00 | 0.00 | 0.00 | 0.00 | 0.00 |
| Creation of cutaneoperitoneal fistula                                                | 0.00 | 0.00 | 0.00 | 0.00 | 0.00 |
| Open and other multiple segmental resection of large intestine                       | NR   | NR   | NR   | NR   | 0.00 |
| Closure of fistula of small intestine, except duodenum                               | NR   | NR   | NR   | 0.00 | 0.00 |
| Multiple segmental resection of small intestine                                      | 0.00 | 0.00 | 0.00 | 0.00 | 0.00 |
| Other and open bilateral repair of indirect inguinal hernia with graft or prosthesis | NR   | NR   | NR   | NR   | 0.00 |
| Permanent colostomy                                                                  | 0.00 | 0.00 | 0.00 | NR   | 0.00 |
| Suture of gastric ulcer site                                                         | 0.00 | 0.00 | 0.00 | 0.00 | 0.00 |
| Excision of lesion of thyroid                                                        | NR   | NR   | NR   | NR   | 0.00 |
| Anastomosis of gallbladder to intestine                                              | NR   | NR   | NR   | NR   | 0.00 |
| Other and open repair of umbilical hernia with graft or prosthesis                   | 0.00 | 0.00 | 0.00 | 0.00 | 0.00 |
| Complete substernal thyroidectomy                                                    | 0.00 | 0.00 | 0.00 | NR   | 0.00 |



|                                                                                                           |      |      |      |      |      |
|-----------------------------------------------------------------------------------------------------------|------|------|------|------|------|
| Exploration of common duct                                                                                | NR   | NR   | NR   | 0.00 | 0.00 |
| Other partial thyroidectomy                                                                               | 0.01 | 0.01 | 0.01 | 0.00 | 0.00 |
| Suture of laceration of small intestine, except duodenum                                                  | 0.01 | 0.01 | 0.01 | 0.01 | 0.00 |
| Repair of colovaginal fistula                                                                             | NR   | NR   | NR   | NR   | 0.00 |
| Other and open bilateral repair of direct inguinal hernia with graft or prosthesis                        | NR   | NR   | NR   | NR   | 0.00 |
| Other proctopexy                                                                                          | NR   | NR   | NR   | 0.00 | 0.00 |
| Unilateral repair of inguinal hernia, not otherwise specified                                             | 0.00 | 0.00 | 0.00 | 0.00 | 0.00 |
| Other and open repair of direct inguinal hernia                                                           | 0.00 | 0.00 | 0.00 | 0.00 | 0.00 |
| Other permanent ileostomy                                                                                 | NR   | NR   | NR   | 0.00 | 0.00 |
| Other pyloroplasty                                                                                        | NR   | NR   | NR   | NR   | 0.00 |
| Partial gastrectomy with anastomosis to esophagus                                                         | NR   | NR   | NR   | NR   | 0.00 |
| Total pancreatectomy                                                                                      | NR   | NR   | NR   | NR   | 0.00 |
| Choledochoenterostomy                                                                                     | 0.00 | 0.00 | 0.00 | 0.00 | 0.00 |
| Other partial pancreatectomy                                                                              | NR   | NR   | NR   | 0.00 | 0.00 |
| Bilateral repair of inguinal hernia, not otherwise specified                                              | NR   | NR   | NR   | 0.00 | NR   |
| Other and open bilateral repair of inguinal hernia, one direct and one indirect, with graft or prosthesis | NR   | NR   | NR   | NR   | 0.00 |
| Partial substernal thyroidectomy                                                                          | NR   | NR   | NR   | NR   | 0.00 |
| Other and open bilateral repair of direct inguinal hernia                                                 | NR   | NR   | NR   | NR   | 0.00 |
| Other repair of stomach                                                                                   | 0.00 | 0.00 | 0.00 | NR   | 0.00 |
| Temporary ileostomy                                                                                       | NR   | NR   | NR   | NR   | 0.00 |
| Intestinal anastomosis, not otherwise specified                                                           | NR   | NR   | NR   | 0.00 | NR   |
| Other and open bilateral repair of inguinal hernia, one direct and one indirect                           | NR   | NR   | NR   | NR   | 0.00 |
| Anastomosis of small intestine to rectal stump                                                            | 0.00 | 0.00 | 0.00 | 0.00 | NR   |
| Anastomosis to anus                                                                                       | NR   | NR   | NR   | NR   | 0.00 |

|                                                                |        |        |        |        |        |
|----------------------------------------------------------------|--------|--------|--------|--------|--------|
| Repair of other vaginoenteric fistula                          | NR     | NR     | NR     | 0.00   | NR     |
| Number of Comorbidities                                        | 5.81   | 5.67   | 5.27   | 5.14   | 5.27   |
| Number of Comorbidities in Near Fine balance list of variables | 0.38   | 0.33   | 0.48   | 0.46   | 0.46   |
| Anesthesia Score                                               | 147.95 | 143.90 | 142.36 | 140.55 | 141.21 |
| More than six comorbidities (%)                                | 0.49   | 0.49   | 0.41   | 0.39   | 0.41   |
| Congestive Heart Failure                                       | 0.26   | 0.26   | 0.22   | 0.20   | 0.22   |
| Stroke                                                         | 0.15   | 0.15   | 0.09   | 0.08   | 0.10   |
| Seizure                                                        | 0.02   | 0.02   | 0.01   | 0.01   | 0.01   |
| Dementia                                                       | 0.15   | 0.15   | 0.09   | 0.09   | 0.10   |
| Alcohol abuse                                                  | 0.03   | 0.03   | 0.02   | 0.02   | 0.02   |
| Drug abuse                                                     | 0.01   | 0.01   | 0.01   | 0.00   | 0.00   |
| Past MI                                                        | 0.09   | 0.08   | 0.09   | 0.10   | 0.10   |
| Past Arrhythmia                                                | 0.25   | 0.25   | 0.29   | 0.28   | 0.30   |
| Unstable Angina                                                | 0.05   | 0.03   | 0.04   | 0.04   | 0.04   |
| Angina                                                         | 0.08   | 0.06   | 0.08   | 0.08   | 0.08   |
| Hypertension                                                   | 0.90   | 0.90   | 0.78   | 0.79   | 0.79   |
| Valvular Heart Disease                                         | 0.27   | 0.29   | 0.28   | 0.27   | 0.29   |
| Chronic Lung Disease                                           | 0.27   | 0.27   | 0.30   | 0.29   | 0.30   |
| Asthma                                                         | 0.11   | 0.12   | 0.10   | 0.09   | 0.09   |
| Liver Disease                                                  | 0.16   | 0.15   | 0.14   | 0.13   | 0.13   |
| Renal Dialysis                                                 | 0.23   | 0.23   | 0.13   | 0.12   | 0.13   |
| Renal Failure                                                  | 0.16   | 0.15   | 0.08   | 0.07   | 0.08   |
| Diabetes                                                       | 0.47   | 0.46   | 0.29   | 0.29   | 0.29   |
| Paraplegia                                                     | 0.05   | 0.04   | 0.02   | 0.02   | 0.02   |
| Collagen Vascular Disease                                      | 0.05   | 0.05   | 0.06   | 0.06   | 0.06   |
| Coagulation disorders                                          | 0.00   | NR     | 0.00   | 0.00   | 0.00   |
| Thrombocytopenia                                               | 0.02   | 0.01   | 0.02   | 0.03   | 0.02   |
| Congenital Coagulation disorder                                | 0.06   | 0.05   | 0.06   | 0.06   | 0.06   |
| Smoking History                                                | 0.07   | 0.05   | 0.09   | 0.09   | 0.09   |
| Post Pulmonary Fibrosis                                        | 0.03   | 0.02   | 0.04   | 0.04   | 0.04   |
| Cushing's disease                                              | NR     | NR     | NR     | NR     | 0.00   |
| Graves' disease                                                | 0.01   | 0.01   | 0.01   | 0.01   | 0.01   |
| Cancer                                                         | 0.47   | 0.47   | 0.51   | 0.48   | 0.50   |
| Abdominal Cancer                                               | 0.06   | 0.06   | 0.06   | 0.05   | 0.05   |
| Hypothyroidism                                                 | 0.15   | 0.12   | 0.23   | 0.22   | 0.22   |
| Chronic Peptic Ulcer                                           | 0.01   | 0.01   | 0.01   | 0.00   | 0.00   |
| AIDS                                                           | 0.00   | NR     | NR     | NR     | 0.00   |
| Weight Loss                                                    | 0.20   | 0.18   | 0.14   | 0.13   | 0.14   |
| Sickle Cell Anemia                                             | NR     | NR     | NR     | NR     | 0.00   |

|                              |      |      |      |      |      |
|------------------------------|------|------|------|------|------|
| Any Comorbidity              | 0.99 | 0.99 | 0.98 | 0.98 | 0.98 |
| Cardiac with CHF             | 0.56 | 0.56 | 0.55 | 0.54 | 0.56 |
| Cardiac without CHF          | 0.49 | 0.49 | 0.51 | 0.50 | 0.52 |
| Stroke/Paraplegia            | 0.16 | 0.16 | 0.10 | 0.09 | 0.10 |
| Any Angina                   | 0.12 | 0.08 | 0.11 | 0.11 | 0.11 |
| Cancer/Abdominal Cancer      | 0.47 | 0.47 | 0.51 | 0.48 | 0.50 |
| Chronic Lung/Asthma          | 0.32 | 0.32 | 0.34 | 0.33 | 0.33 |
| Emergency type admission (%) | 0.47 | 0.52 | 0.37 | 0.39 | 0.38 |
| Transfer-in (%)              | 0.01 | 0.01 | 0.01 | 0.01 | 0.01 |

**Note.** NR, Not Reportable N<11

**Table 4. Complete balance table for Recent Era (2013-2015)**

| Variable                                                                   | Black Patients | Tapered Matches                         |                          |              | White Patients (unmatched) |
|----------------------------------------------------------------------------|----------------|-----------------------------------------|--------------------------|--------------|----------------------------|
|                                                                            |                | Presentation + Procedure + Demographics | Procedure + Demographics | Demographics |                            |
| N                                                                          | 4,964          | 4,964                                   | 4,964                    | 4,964        | 74,108                     |
| Age                                                                        | 75.46          | 75.01                                   | 75.45                    | 75.46        | 77.03                      |
| Year of match                                                              | 2014.10        | 2014.10                                 | 2014.10                  | 2014.10      | 2014.10                    |
| Age 65-69 (%)                                                              | 0.27           | 0.28                                    | 0.27                     | 0.27         | 0.22                       |
| Age 70-74 (%)                                                              | 0.25           | 0.28                                    | 0.26                     | 0.25         | 0.23                       |
| Age 75-79 (%)                                                              | 0.21           | 0.19                                    | 0.20                     | 0.21         | 0.20                       |
| Age 80-84 (%)                                                              | 0.14           | 0.14                                    | 0.15                     | 0.14         | 0.17                       |
| Age 85 plus (%)                                                            | 0.12           | 0.11                                    | 0.12                     | 0.12         | 0.18                       |
| State- California (%)                                                      | 0.24           | 0.24                                    | 0.24                     | 0.24         | 0.28                       |
| State- New Jersey (%)                                                      | 0.23           | 0.24                                    | 0.22                     | 0.23         | 0.15                       |
| State- Florida (%)                                                         | 0.34           | 0.34                                    | 0.34                     | 0.34         | 0.35                       |
| State- Pennsylvania (%)                                                    | 0.19           | 0.17                                    | 0.19                     | 0.19         | 0.21                       |
| State- NJ/PA (%)                                                           | 0.42           | 0.42                                    | 0.42                     | 0.42         | 0.37                       |
| Male (%)                                                                   | 0.39           | 0.39                                    | 0.39                     | 0.39         | 0.45                       |
| Year of match- 2013 (%)                                                    | 0.23           | 0.23                                    | 0.23                     | 0.23         | 0.23                       |
| Year of match- 2014 (%)                                                    | 0.44           | 0.44                                    | 0.44                     | 0.44         | 0.45                       |
| Year of match- 2015 (%)                                                    | 0.33           | 0.33                                    | 0.33                     | 0.33         | 0.33                       |
| <b>Procedure type (%)</b>                                                  |                |                                         |                          |              |                            |
| Open and other cecectomy                                                   | 0.01           | 0.01                                    | 0.01                     | 0.00         | 0.00                       |
| Laparoscopic cholecystectomy                                               | 0.19           | 0.19                                    | 0.19                     | 0.21         | 0.22                       |
| Open and other right hemicolectomy                                         | 0.08           | 0.08                                    | 0.08                     | 0.06         | 0.07                       |
| Other anterior resection of rectum                                         | 0.01           | 0.01                                    | 0.01                     | 0.02         | 0.02                       |
| Cholecystectomy                                                            | 0.03           | 0.03                                    | 0.03                     | 0.03         | 0.03                       |
| Open and other sigmoidectomy                                               | 0.03           | 0.03                                    | 0.03                     | 0.05         | 0.05                       |
| Radical pancreaticoduodenectomy                                            | 0.01           | 0.01                                    | 0.01                     | 0.01         | 0.01                       |
| Other partial resection of small intestine                                 | 0.07           | 0.07                                    | 0.07                     | 0.06         | 0.06                       |
| Other lysis of peritoneal adhesions                                        | 0.05           | 0.05                                    | 0.05                     | 0.04         | 0.04                       |
| Other resection of rectum                                                  | 0.00           | 0.00                                    | 0.00                     | 0.01         | 0.01                       |
| Other and open repair of indirect inguinal hernia with graft or prosthesis | 0.01           | 0.01                                    | 0.01                     | 0.01         | 0.01                       |
| Distal pancreatectomy                                                      | 0.00           | 0.00                                    | 0.00                     | 0.01         | 0.01                       |
| Closure of stoma of small intestine                                        | 0.01           | 0.01                                    | 0.01                     | 0.01         | 0.01                       |

|                                                                         |      |      |      |      |      |
|-------------------------------------------------------------------------|------|------|------|------|------|
| Other unilateral femoral herniorrhaphy                                  | NR   | NR   | NR   | 0.00 | 0.00 |
| Open and other left hemicolectomy                                       | 0.02 | 0.02 | 0.02 | 0.02 | 0.02 |
| Unilateral adrenalectomy                                                | 0.01 | 0.01 | 0.01 | 0.00 | 0.00 |
| Abdominal proctopexy                                                    | NR   | NR   | NR   | 0.00 | 0.00 |
| Other gastroenterostomy without gastrectomy                             | 0.01 | 0.01 | 0.01 | 0.00 | 0.00 |
| Exteriorization of large intestine                                      | 0.01 | 0.01 | 0.01 | 0.01 | 0.01 |
| Anterior resection of rectum with synchronous colostomy                 | 0.00 | 0.00 | 0.00 | 0.00 | 0.00 |
| Total splenectomy                                                       | 0.00 | 0.00 | 0.00 | 0.01 | 0.01 |
| Other procedures for creation of esophagogastric sphincteric competence | NR   | NR   | NR   | NR   | 0.00 |
| Other total gastrectomy                                                 | 0.00 | 0.00 | 0.00 | NR   | 0.00 |
| Other and unspecified partial excision of large intestine               | 0.01 | 0.01 | 0.01 | 0.01 | 0.01 |
| Other open umbilical herniorrhaphy                                      | 0.00 | 0.00 | 0.00 | 0.00 | 0.00 |
| Laparoscopic appendectomy                                               | 0.03 | 0.03 | 0.03 | 0.04 | 0.04 |
| Complete parathyroidectomy                                              | NR   | NR   | NR   | NR   | 0.00 |
| Incisional hernia repair                                                | 0.01 | 0.01 | 0.01 | 0.01 | 0.01 |
| Temporary colostomy                                                     | NR   | NR   | NR   | NR   | 0.00 |
| Repair of rectovaginal fistula                                          | NR   | NR   | NR   | NR   | 0.00 |
| Other pull-through resection of rectum                                  | NR   | NR   | NR   | NR   | 0.00 |
| Other destruction of lesion of liver                                    | 0.00 | 0.00 | 0.00 | NR   | 0.00 |
| Small-to-small intestinal anastomosis                                   | NR   | NR   | NR   | NR   | 0.00 |
| Other open incisional hernia repair with graft or prosthesis            | 0.02 | 0.02 | 0.02 | 0.03 | 0.03 |
| Partial esophagectomy                                                   | NR   | NR   | NR   | 0.00 | 0.00 |
| Laparoscopic gastroenterostomy                                          | 0.01 | 0.01 | 0.01 | 0.01 | 0.01 |
| Open and other resection of transverse colon                            | 0.01 | 0.01 | 0.01 | 0.01 | 0.01 |
| Exteriorization of small intestine                                      | 0.00 | 0.00 | 0.00 | 0.00 | 0.00 |
| Other enterostomy                                                       | 0.00 | 0.00 | 0.00 | NR   | 0.00 |

|                                                                                           |      |      |      |      |      |
|-------------------------------------------------------------------------------------------|------|------|------|------|------|
| Unilateral thyroid lobectomy                                                              | 0.01 | 0.01 | 0.01 | 0.00 | 0.00 |
| Complete thyroidectomy                                                                    | 0.02 | 0.02 | 0.02 | 0.01 | 0.01 |
| Partial gastrectomy with anastomosis to duodenum                                          | NR   | NR   | NR   | NR   | 0.00 |
| Other and open repair of direct inguinal hernia with graft or prosthesis                  | 0.01 | 0.01 | 0.01 | 0.01 | 0.01 |
| Other parathyroidectomy                                                                   | 0.01 | 0.01 | 0.01 | 0.00 | 0.00 |
| Laparoscopic lysis of peritoneal adhesions                                                | 0.02 | 0.02 | 0.02 | 0.01 | 0.02 |
| Lobectomy of liver                                                                        | NR   | NR   | NR   | 0.00 | 0.00 |
| Anastomosis of hepatic duct to gastrointestinal tract                                     | NR   | NR   | NR   | NR   | 0.00 |
| Suture of laceration of large intestine                                                   | NR   | NR   | NR   | NR   | 0.00 |
| Repair of pericostomy hernia                                                              | 0.00 | 0.00 | 0.00 | 0.00 | 0.00 |
| Common duct exploration for removal of calculus                                           | NR   | NR   | NR   | NR   | 0.00 |
| Total esophagectomy                                                                       | NR   | NR   | NR   | NR   | 0.00 |
| Open and other partial gastrectomy                                                        | 0.01 | 0.01 | 0.01 | 0.00 | 0.00 |
| Partial hepatectomy                                                                       | 0.00 | 0.00 | 0.00 | 0.00 | 0.01 |
| Esophagectomy, not otherwise specified                                                    | NR   | NR   | NR   | NR   | 0.00 |
| Other and open repair of other hernia of anterior abdominal wall with graft or prosthesis | 0.01 | 0.01 | 0.01 | 0.01 | 0.01 |
| Laparoscopic procedures for creation of esophagogastric sphincteric competence            | 0.00 | 0.00 | 0.00 | 0.02 | 0.01 |
| Closure of stoma of large intestine                                                       | 0.01 | 0.01 | 0.01 | 0.01 | 0.01 |
| Other repair of intestine                                                                 | NR   | NR   | NR   | NR   | 0.00 |
| Bilateral inguinal hernia repair with graft or prosthesis, not otherwise specified        | NR   | NR   | NR   | NR   | 0.00 |
| Esophagomyotomy                                                                           | 0.00 | 0.00 | 0.00 | 0.00 | 0.00 |
| Other appendectomy                                                                        | 0.01 | 0.01 | 0.01 | 0.01 | 0.01 |
| Local excision of other lesion or tissue of stomach                                       | 0.01 | 0.01 | 0.01 | 0.00 | 0.00 |
| Unilateral repair of femoral hernia with graft or prosthesis                              | NR   | NR   | NR   | 0.00 | 0.00 |

|                                                                                      |      |      |      |      |      |
|--------------------------------------------------------------------------------------|------|------|------|------|------|
| Ileostomy, not otherwise specified                                                   | NR   | NR   | NR   | NR   | 0.00 |
| Partial gastrectomy with anastomosis to jejunum                                      | 0.01 | 0.01 | 0.01 | 0.01 | 0.01 |
| Other small-to-large intestinal anastomosis                                          | 0.00 | 0.00 | 0.00 | 0.00 | 0.00 |
| Other and open repair of indirect inguinal hernia                                    | NR   | NR   | NR   | NR   | 0.00 |
| Repair of other hernia of anterior abdominal wall                                    | 0.01 | 0.01 | 0.01 | 0.01 | 0.01 |
| Repair of inguinal hernia with graft or prosthesis, not otherwise specified          | 0.01 | 0.01 | 0.01 | 0.01 | 0.01 |
| Large-to-large intestinal anastomosis                                                | NR   | NR   | NR   | NR   | 0.00 |
| Laparoscopic sigmoidectomy                                                           | 0.02 | 0.02 | 0.02 | 0.03 | 0.02 |
| Suture of duodenal ulcer site                                                        | 0.01 | 0.01 | 0.01 | 0.01 | 0.01 |
| Laparoscopic cecectomy                                                               | 0.01 | 0.01 | 0.01 | 0.00 | 0.00 |
| Open total intra-abdominal colectomy                                                 | 0.01 | 0.01 | 0.01 | 0.00 | 0.01 |
| Laparoscopic abdominoperineal resection of the rectum                                | NR   | NR   | NR   | NR   | 0.00 |
| Colostomy, not otherwise specified                                                   | 0.01 | 0.01 | 0.01 | 0.01 | 0.01 |
| Creation of cutaneoperitoneal fistula                                                | 0.01 | 0.01 | 0.01 | 0.00 | 0.00 |
| Laparoscopic total intra-abdominal colectomy                                         | NR   | NR   | NR   | NR   | 0.00 |
| Laparoscopic right hemicolectomy                                                     | 0.05 | 0.05 | 0.05 | 0.04 | 0.04 |
| Open and other multiple segmental resection of large intestine                       | NR   | NR   | NR   | NR   | 0.00 |
| Open abdominoperineal resection of the rectum                                        | 0.00 | 0.00 | 0.00 | 0.00 | 0.00 |
| Closure of fistula of small intestine, except duodenum                               | NR   | NR   | NR   | NR   | 0.00 |
| Multiple segmental resection of small intestine                                      | 0.00 | 0.00 | 0.00 | NR   | 0.00 |
| Other and open bilateral repair of indirect inguinal hernia with graft or prosthesis | NR   | NR   | NR   | NR   | 0.00 |
| Internal fixation of bone without fracture reduction, tibia and fibula               | 0.00 | 0.00 | 0.00 | 0.00 | 0.00 |
| Permanent colostomy                                                                  | NR   | NR   | NR   | NR   | 0.00 |

|                                                                                                           |      |      |      |      |      |
|-----------------------------------------------------------------------------------------------------------|------|------|------|------|------|
| Suture of gastric ulcer site                                                                              | 0.01 | 0.01 | 0.01 | 0.01 | 0.00 |
| Total removal of small intestine                                                                          | NR   | NR   | NR   | NR   | 0.00 |
| Anastomosis of gallbladder to intestine                                                                   | NR   | NR   | NR   | NR   | NR   |
| Other and open repair of umbilical hernia with graft or prosthesis                                        | 0.00 | 0.00 | 0.00 | 0.00 | 0.00 |
| Complete substernal thyroidectomy                                                                         | NR   | NR   | NR   | NR   | 0.00 |
| Exploration of common duct                                                                                | NR   | NR   | NR   | 0.00 | NR   |
| Other partial thyroidectomy                                                                               | 0.00 | 0.00 | 0.00 | NR   | 0.00 |
| Suture of laceration of small intestine, except duodenum                                                  | NR   | NR   | NR   | NR   | 0.00 |
| Repair of colovaginal fistula                                                                             | NR   | NR   | NR   | NR   | 0.00 |
| Other proctopexy                                                                                          | NR   | NR   | NR   | 0.00 | 0.00 |
| Unilateral repair of inguinal hernia, not otherwise specified                                             | 0.00 | 0.00 | 0.00 | 0.00 | 0.00 |
| Other and open repair of direct inguinal hernia                                                           | NR   | NR   | NR   | NR   | 0.00 |
| Laparoscopic resection of transverse colon                                                                | 0.00 | 0.00 | 0.00 | 0.00 | 0.00 |
| Laparoscopic left hemicolectomy                                                                           | 0.01 | 0.01 | 0.01 | 0.01 | 0.01 |
| Other laparoscopic partial excision of large intestine                                                    | 0.00 | 0.00 | 0.00 | 0.00 | 0.00 |
| Other permanent ileostomy                                                                                 | NR   | NR   | NR   | NR   | 0.00 |
| Other pyloroplasty                                                                                        | NR   | NR   | NR   | NR   | 0.00 |
| Partial gastrectomy with anastomosis to esophagus                                                         | NR   | NR   | NR   | NR   | 0.00 |
| Total pancreatectomy                                                                                      | NR   | NR   | NR   | NR   | 0.00 |
| Choledochoenterostomy                                                                                     | NR   | NR   | NR   | NR   | 0.00 |
| Other and open repair of diaphragmatic hernia, abdominal approach                                         | NR   | NR   | NR   | 0.00 | 0.00 |
| Abdominoperineal resection of the rectum, not otherwise specified                                         | NR   | NR   | NR   | NR   | 0.00 |
| Other partial pancreatectomy                                                                              | NR   | NR   | NR   | NR   | 0.00 |
| Other and open bilateral repair of inguinal hernia, one direct and one indirect, with graft or prosthesis | NR   | NR   | NR   | 0.00 | 0.00 |



|                                                                                                         |        |        |        |        |        |
|---------------------------------------------------------------------------------------------------------|--------|--------|--------|--------|--------|
| Laparoscopic partial cholecystectomy                                                                    | NR     | NR     | NR     | NR     | 0.00   |
| Laparoscopic bilateral repair of direct inguinal hernia with graft or prosthesis                        | NR     | NR     | NR     | 0.00   | 0.00   |
| Partial substernal thyroidectomy                                                                        | NR     | NR     | NR     | NR     | 0.00   |
| Laparoscopic bilateral repair of inguinal hernia with graft or prosthesis, not otherwise specified      | NR     | NR     | NR     | 0.00   | 0.00   |
| Laparoscopic multiple segmental resection of large intestine                                            | NR     | NR     | NR     | NR     | 0.00   |
| Other and unspecified total intra-abdominal colectomy                                                   | NR     | NR     | NR     | NR     | 0.00   |
| Laparoscopic repair of direct inguinal hernia with graft or prosthesis                                  | NR     | NR     | NR     | NR     | 0.00   |
| Laparoscopic bilateral repair of inguinal hernia, one direct and one indirect, with graft or prosthesis | NR     | NR     | NR     | NR     | 0.00   |
| Other repair of stomach                                                                                 | NR     | NR     | NR     | NR     | 0.00   |
| Intestinal anastomosis, not otherwise specified                                                         | NR     | NR     | NR     | NR     | 0.00   |
| Laparoscopic repair of indirect inguinal hernia with graft or prosthesis                                | NR     | NR     | NR     | NR     | 0.00   |
| Other and open bilateral repair of inguinal hernia, one direct and one indirect                         | 0.00   | 0.00   | 0.00   | 0.00   | NR     |
| Anastomosis to anus                                                                                     | NR     | NR     | NR     | NR     | 0.00   |
| Continent ileostomy                                                                                     | 0.00   | 0.00   | 0.00   | 0.00   | NR     |
| Laparoscopic repair of inguinal hernia with graft or prosthesis, not otherwise specified                | NR     | NR     | NR     | NR     | 0.00   |
| Laparoscopic bilateral repair of indirect inguinal hernia with graft or prosthesis                      | NR     | NR     | NR     | NR     | 0.00   |
| Substernal thyroidectomy, not otherwise specified                                                       | 0.00   | 0.00   | 0.00   | 0.00   | NR     |
| Number of Comorbidities                                                                                 | 6.63   | 6.51   | 5.96   | 5.85   | 6.00   |
| Number of Comorbidities in Near Fine balance list of variables                                          | 0.63   | 0.62   | 0.76   | 0.76   | 0.76   |
| Anesthesia Score                                                                                        | 155.01 | 150.37 | 150.15 | 151.78 | 150.71 |

|                                 |      |      |      |      |      |
|---------------------------------|------|------|------|------|------|
| More than six comorbidities (%) | 0.61 | 0.61 | 0.51 | 0.51 | 0.53 |
| Congestive Heart Failure        | 0.26 | 0.26 | 0.18 | 0.18 | 0.19 |
| Stroke                          | 0.21 | 0.21 | 0.13 | 0.13 | 0.14 |
| Seizure                         | 0.05 | 0.03 | 0.03 | 0.02 | 0.02 |
| Dementia                        | 0.17 | 0.16 | 0.11 | 0.10 | 0.12 |
| Alcohol abuse                   | 0.03 | 0.03 | 0.03 | 0.03 | 0.03 |
| Drug abuse                      | 0.03 | 0.03 | 0.02 | 0.02 | 0.02 |
| Past MI                         | 0.11 | 0.10 | 0.10 | 0.10 | 0.11 |
| Past Arrhythmia                 | 0.32 | 0.31 | 0.32 | 0.32 | 0.35 |
| Unstable Angina                 | 0.03 | 0.02 | 0.02 | 0.02 | 0.02 |
| Angina                          | 0.06 | 0.05 | 0.05 | 0.05 | 0.05 |
| Hypertension                    | 0.93 | 0.93 | 0.85 | 0.85 | 0.85 |
| Valvular Heart Disease          | 0.26 | 0.27 | 0.28 | 0.27 | 0.28 |
| Chronic Lung Disease            | 0.27 | 0.27 | 0.28 | 0.27 | 0.28 |
| Asthma                          | 0.14 | 0.14 | 0.12 | 0.11 | 0.11 |
| Liver Disease                   | 0.21 | 0.20 | 0.20 | 0.20 | 0.20 |
| Renal Dialysis                  | 0.42 | 0.42 | 0.27 | 0.26 | 0.28 |
| Renal Failure                   | 0.14 | 0.13 | 0.07 | 0.05 | 0.06 |
| Diabetes                        | 0.51 | 0.51 | 0.34 | 0.33 | 0.33 |
| Paraplegia                      | 0.06 | 0.04 | 0.02 | 0.02 | 0.02 |
| Collagen Vascular Disease       | 0.07 | 0.07 | 0.08 | 0.08 | 0.08 |
| Coagulation disorders           | 0.00 | 0.00 | 0.01 | 0.01 | 0.01 |
| Thrombocytopenia                | 0.04 | 0.03 | 0.04 | 0.03 | 0.04 |
| Congenital Coagulation disorder | 0.06 | 0.06 | 0.06 | 0.06 | 0.06 |
| Smoking History                 | 0.23 | 0.23 | 0.28 | 0.28 | 0.28 |
| Post Pulmonary Fibrosis         | 0.03 | 0.02 | 0.03 | 0.03 | 0.03 |
| Cushing's disease               | NR   | NR   | NR   | NR   | 0.00 |
| Graves' disease                 | 0.01 | 0.01 | 0.01 | 0.00 | 0.00 |

**Note.** NR, Not Reportable N<11

**Table 5. Readmission Outcomes for Black Study Population and 3 Matched White Populations: Early Era (2003-2005), Recent Era (2013, 2015), and the Difference between the Eras to Evaluate whether the Black-White Difference is Different in the Two Eras**

|                                                  |                               | <b>Black Patients</b> | <b>Tapered Matches of White Controls</b> |                          |              |
|--------------------------------------------------|-------------------------------|-----------------------|------------------------------------------|--------------------------|--------------|
|                                                  |                               |                       | Presentation + Procedure + Demographics  | Procedure + Demographics | Demographics |
| <b>Early Era (2003-2005)</b>                     | 30-day readmission (or death) | 24.53                 | 23.58                                    | 20.19***                 | 19.12***     |
| <b>Recent Era (2013-2015)</b>                    | 30-day readmission (or death) | 21.70                 | 21.68                                    | 18.19***                 | 18.39***     |
| <b>Difference in Difference (Recent - Early)</b> | 30-day readmission (or death) | —                     | -0.93%                                   | -0.83%                   | -2.10%       |

**Notes.** Black-White difference between eras is defined by the Black-White difference in Recent Era minus the Black-White difference in Early Era. Significance tests for binary variables used McNemar test (\* <0.05, \*\* <0.01, \*\*\*<0.001). For the difference in difference across eras, Gart's test for binary outcomes was used (+ < 0.05, ++ < 0.01, +++ < 0.001). The symbols were marked in the later era if the difference in difference was significant.

**Table 6. Effect of race and hospital nursing characteristics on odds of 30-day Readmission or Death, after matching patients on demographics, procedure, and presentation variables**

| Variables in the Model                                           | Model 1             | Model 2               | Model 3               | Model 4             |
|------------------------------------------------------------------|---------------------|-----------------------|-----------------------|---------------------|
|                                                                  | OR (95% CI)         | OR (95% CI)           | OR (95% CI)           | OR (95% CI)         |
| Black                                                            | 1.04<br>(0.97-1.11) | 1.05<br>(0.98-1.12)   | 1.00<br>(0.91-1.09)   | 0.99<br>(0.90-1.09) |
| Nursing Resources (High vs Low)                                  | ---                 | 0.86 *<br>(0.75-1.00) | 0.86 *<br>(0.75-1.00) | 0.87<br>(0.74-1.01) |
| Nursing Resources (Middle vs Low)                                | ---                 | 0.93<br>(0.83-1.05)   | 0.93<br>(0.82-1.04)   | 0.93<br>(0.82-1.05) |
| Black*Nursing Resources (High vs Low) Interaction                | ---                 | ---                   | 0.93<br>(0.85-1.03)   | 0.94<br>(0.85-1.03) |
| Black*Nursing Resources (Middle vs Low) Interaction              | ---                 | ---                   | 0.95<br>(0.85-1.05)   | 0.95<br>(0.86-1.06) |
| Major Teaching Hospital                                          | ---                 | ---                   | ---                   | 1.05<br>(0.90-1.22) |
| Minor Teaching Hospital                                          | ---                 | ---                   | ---                   | 1.00<br>(0.89-1.13) |
| Large Size (>250 beds)                                           | ---                 | ---                   | ---                   | 0.93<br>(0.83-1.05) |
| High Technology Hospital                                         | ---                 | ---                   | ---                   | 1.07<br>(0.96-1.19) |
| General Surgery Volume                                           | ---                 | ---                   | ---                   | 0.99<br>(0.98-1.01) |
| <b>Test for improvement in fit with greater model complexity</b> |                     |                       |                       |                     |
| Chi-square                                                       | ---                 | 4.09                  | 2.23                  | 5.06                |
| Degrees of Freedom                                               | ---                 | 2                     | 2                     | 5                   |
| p-value                                                          | ---                 | 0.1295                | 0.3280                | 0.4085              |

**Table 7. Quality of Matches for Selected\* Variables, Early Era (2003-2005)**

| Variable                                    | Black Patients<br>(n = 6,752) | Tapered Matches                                        |                                         |                             | White Patients<br>(unmatched)<br>(n = 107,001) |
|---------------------------------------------|-------------------------------|--------------------------------------------------------|-----------------------------------------|-----------------------------|------------------------------------------------|
|                                             |                               | Presentation + Procedure + Demographics<br>(n = 6,752) | Procedure + Demographics<br>(n = 6,752) | Demographics<br>(n = 6,752) |                                                |
| State (%)                                   |                               |                                                        |                                         |                             |                                                |
| California                                  | 23.2                          | 23.2                                                   | 23.2                                    | 23.2                        | <b>24.9<sup>c</sup></b>                        |
| Florida                                     | 34.0                          | 34.0                                                   | 34.0                                    | 34.0                        | <b>35.5<sup>a</sup></b>                        |
| New Jersey / Pennsylvania                   | 42.8                          | 42.8                                                   | 42.8                                    | 42.8                        | <b>39.6<sup>c</sup></b>                        |
| Year of Procedure (%)                       |                               |                                                        |                                         |                             |                                                |
| 2004                                        | 21.7                          | 22.7                                                   | 21.7                                    | 21.7                        | 21.6                                           |
| 2005                                        | 44.5                          | 44.9                                                   | 44.5                                    | 44.5                        | 45.1                                           |
| 2006                                        | 33.8                          | 32.4                                                   | 33.8                                    | 33.8                        | 33.3                                           |
| Age at Procedure                            | 76.0                          | 75.8                                                   | 76.0                                    | 76.0                        | <b>77.5<sup>c</sup></b>                        |
| % Male                                      | 38.6                          | 38.6                                                   | 38.6                                    | 38.6                        | <b>43.1<sup>c</sup></b>                        |
| Procedures (%)                              |                               |                                                        |                                         |                             |                                                |
| Laparoscopic cholecystectomy (5123)         | 15.8                          | 15.8                                                   | 15.8                                    | <b>21.0<sup>c</sup></b>     | <b>19.9<sup>c</sup></b>                        |
| Open right hemicolectomy (4573)             | 13.6                          | 13.6                                                   | 13.6                                    | <b>11.3<sup>c</sup></b>     | <b>12.1<sup>c</sup></b>                        |
| Lysis of peritoneal adhesion (5459)         | 6.2                           | 6.2                                                    | 6.2                                     | <b>4.6<sup>c</sup></b>      | <b>4.6<sup>c</sup></b>                         |
| Partial resection of small intestine (4562) | 5.7                           | 5.7                                                    | 5.7                                     | <b>4.6<sup>b</sup></b>      | <b>4.9<sup>b</sup></b>                         |
| Open cholecystectomy (5122)                 | 5.6                           | 5.6                                                    | 5.6                                     | 5.5                         | 5.4                                            |
| Selected Comorbidities (%)                  |                               |                                                        |                                         |                             |                                                |
| Hypertension                                | 89.8                          | 90.0                                                   | <b>78.3<sup>c</sup></b>                 | <b>79.3<sup>c</sup></b>     | <b>79.5<sup>c</sup></b>                        |
| Diabetes                                    | 46.5                          | 46.5                                                   | <b>28.5<sup>c</sup></b>                 | <b>29.3<sup>c</sup></b>     | <b>28.5<sup>c</sup></b>                        |
| Congestive heart failure                    | 25.8                          | 25.7                                                   | <b>21.6<sup>c</sup></b>                 | <b>20.3<sup>c</sup></b>     | <b>21.6<sup>c</sup></b>                        |
| Renal dialysis                              | 23.2                          | 23.0                                                   | <b>13.1<sup>c</sup></b>                 | <b>12.4<sup>c</sup></b>     | <b>13.4<sup>c</sup></b>                        |
| Renal failure                               | 15.6                          | 15.4                                                   | <b>7.7<sup>c</sup></b>                  | <b>7.1<sup>c</sup></b>      | <b>7.7<sup>c</sup></b>                         |
| Paraplegia                                  | 4.8                           | <b>3.6<sup>c</sup></b>                                 | <b>1.8<sup>c</sup></b>                  | <b>1.7<sup>c</sup></b>      | <b>1.9<sup>c</sup></b>                         |
| Mortality Risk Score (prob)                 | 0.078                         | 0.078                                                  | <b>0.062<sup>c</sup></b>                | <b>0.056<sup>c</sup></b>    | <b>0.063<sup>c</sup></b>                       |
| Emergency admission (%)                     | 47.3                          | <b>51.6<sup>c</sup></b>                                | <b>37.5<sup>c</sup></b>                 | <b>38.6<sup>c</sup></b>     | <b>37.9<sup>c</sup></b>                        |
| Transfer status (%)                         | 0.9                           | 1.0                                                    | 0.9                                     | <b>0.6<sup>a</sup></b>      | 0.7                                            |
| Anesthesia time (minutes)                   | 148                           | <b>144<sup>c</sup></b>                                 | <b>142<sup>c</sup></b>                  | <b>141<sup>c</sup></b>      | <b>141<sup>c</sup></b>                         |
| Dual-eligible (%)                           | 38.8                          | <b>12.0<sup>c</sup></b>                                | <b>10.0<sup>c</sup></b>                 | <b>9.7<sup>c</sup></b>      | <b>9.3<sup>c</sup></b>                         |
| Neighborhood median household income (\$)   | 23,658                        | <b>31,844<sup>c</sup></b>                              | <b>32,359<sup>c</sup></b>               | <b>32,182<sup>c</sup></b>   | <b>31,729<sup>c</sup></b>                      |
| Neighborhood high school graduate (%)       | 82.2                          | <b>88.6<sup>c</sup></b>                                | <b>88.9<sup>c</sup></b>                 | <b>88.9<sup>c</sup></b>     | <b>88.7<sup>c</sup></b>                        |
| Neighborhood college graduate (%)           | 32.2                          | <b>39.7<sup>c</sup></b>                                | <b>40.0<sup>c</sup></b>                 | <b>40.0<sup>c</sup></b>     | <b>39.6<sup>c</sup></b>                        |

**Notes.** Bolded numbers represent significant differences <sup>a</sup><0.005; <sup>b</sup><0.01; <sup>c</sup><0.001. \*Complete balance tables with all variables are available in Appendix Table 2 for Early Era (2003-2005) patient matches. Dual-eligible is a beneficiary of both Medicare and Medicaid. Measures of patient socioeconomic status were obtained through the American Community Survey and are based on

neighborhood-level characteristics: median household income, percentage of high school graduates and percentage of college graduates.

**Figure 1. Distribution of Mortality Risk Score for the Black Study Population, the Total White Study Population, and 3 Matched White Populations, Early Era (2003-2005)**

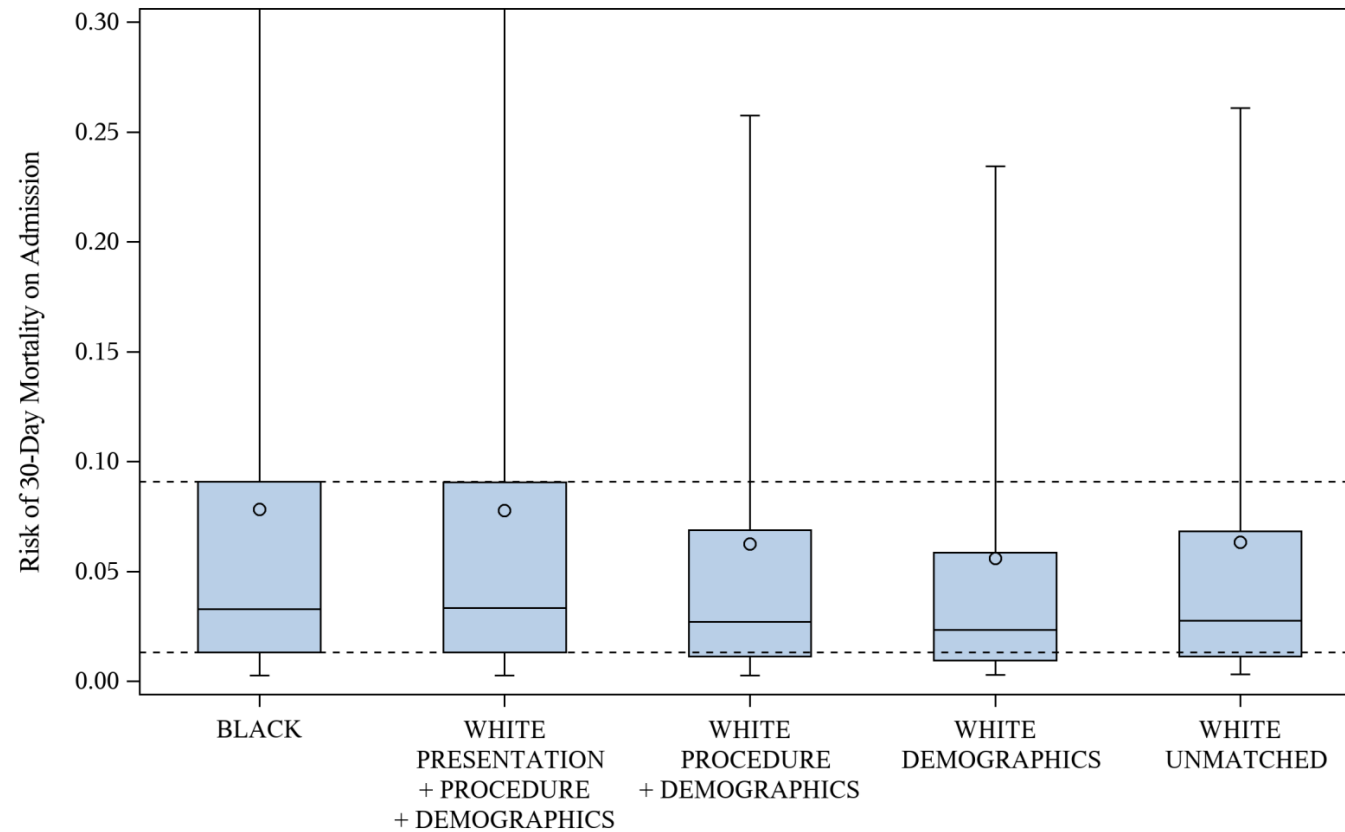

**Note.** The tails of each box plot represent the lower 5% and upper 95% of the distribution. The mortality risk estimates presented here are based on risk at the time of admission.

**Table 8. Exterior Match to Compare Mortality Differences in White Control Groups**

|                                                 |                       | <b>Black Patients</b> | <b>Tapered Matches of White Controls</b> |                          |              |
|-------------------------------------------------|-----------------------|-----------------------|------------------------------------------|--------------------------|--------------|
|                                                 |                       |                       | Presentation + Procedure + Demographics  | Procedure + Demographics | Demographics |
| <b>Early Era (2003-2005)</b>                    | 1-year mortality      | 21.45%                | 20.51%                                   | 17.54%***                | 15.52%***    |
|                                                 | 30-day mortality      | 6.71%                 | 7.81%**                                  | 6.47%                    | 5.60%**      |
|                                                 | <b>Exterior match</b> | <b>Pvalue</b>         |                                          |                          |              |
|                                                 | Demo vs. Proc 1-year  | 0.0009                |                                          | x                        | x            |
|                                                 | Proc vs. Pres 1-year  | < 0.0001              | x                                        | x                        |              |
|                                                 | Demo vs. Pres 1-year  | < 0.0001              | x                                        |                          | x            |
|                                                 | Demo vs. Proc 30-day  | 0.0261                |                                          | x                        | x            |
|                                                 | Proc vs. Pres 30-day  | 0.0012                | x                                        | x                        |              |
|                                                 | Demo vs. Pres 30-day  | < 0.0001              | x                                        |                          | x            |
| <b>Recent Era (2013-2015)</b>                   | 1-year mortality      | 15.87%                | 16.16%                                   | 12.99%***                | 12.29%***    |
|                                                 | 30-day mortality      | 5.70%                 | 7.88%***                                 | 5.74%                    | 5.42%        |
|                                                 | <b>Exterior match</b> | <b>Pvalue</b>         |                                          |                          |              |
|                                                 | Demo vs. Proc 1-year  | 0.2752                |                                          | x                        | x            |
|                                                 | Proc vs. Pres 1-year  | < 0.0001              | x                                        | x                        |              |
|                                                 | Demo vs. Pres 1-year  | < 0.0001              | x                                        |                          | x            |
|                                                 | Demo vs. Proc 30-day  | 0.4615                |                                          | x                        | x            |
|                                                 | Proc vs. Pres 30-day  | < 0.0001              | x                                        | x                        |              |
|                                                 | Demo vs. Pres 30-day  | < 0.0001              | x                                        |                          | x            |
| <b>Difference between Eras (Recent - Early)</b> | 1-year mortality      | --                    | -1.23%                                   | -1.03%                   | -2.35%       |
|                                                 | 30-day mortality      | --                    | -1.08%                                   | -0.28%                   | -0.83%       |

Note. The two White control groups being compared are marked with an 'x'. P-values test the equality of the mortality in the two White controls groups being compared. Summary: The White control groups are significantly different in all cases except the Demographics vs Demographics+Procedure groups in the Recent Era for both 1-year and 30-day mortality. This suggests that Black patients were having higher risk procedures than White patients in the Early Era, but not the Recent Era.
